# Supplementary material for: Sequential Staudinger ketene–imine cycloaddition, RCM approach to polycyclic macrocyclic bisazetidinones
Source: Royal Society of Chemistry journal article supplement (doi:10.1039/c3ra40649k), 2013-01-01

## Supporting Information

### Sequential Staudinger ketene-imine cycloaddition, RCM approach to polycyclic macrocyclic bisazetidiones

Yehia A. Ibrahim,\* Nouria A. Al-Awadi, Talal F. Al-Azemi, Susan Abraham and  
Elizabeth John

*Chemistry Department, Faculty of Science, Kuwait University, P.O. Box 5969, Safat  
13060, Kuwait.*

Email: yehia.ibrahim@ku.edu.kw, Fax: +965-24816482

$^1\text{H}$ ,  $^{13}\text{C}$  NMR spectra and some Representative 2-D NMR

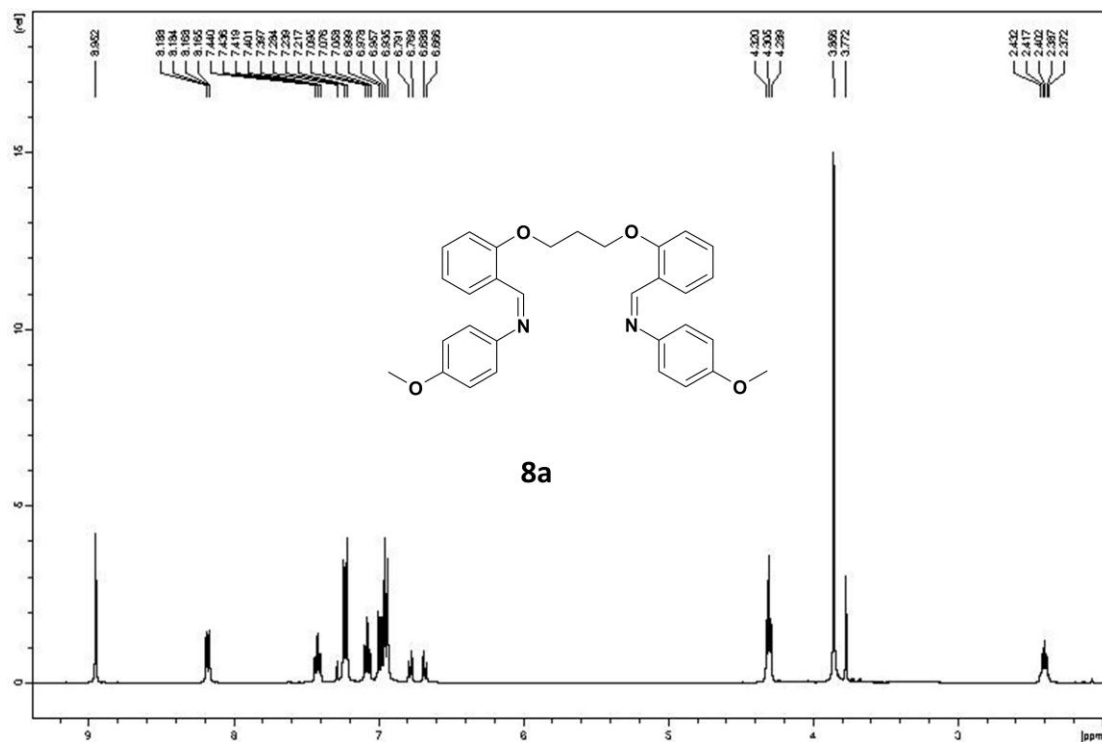

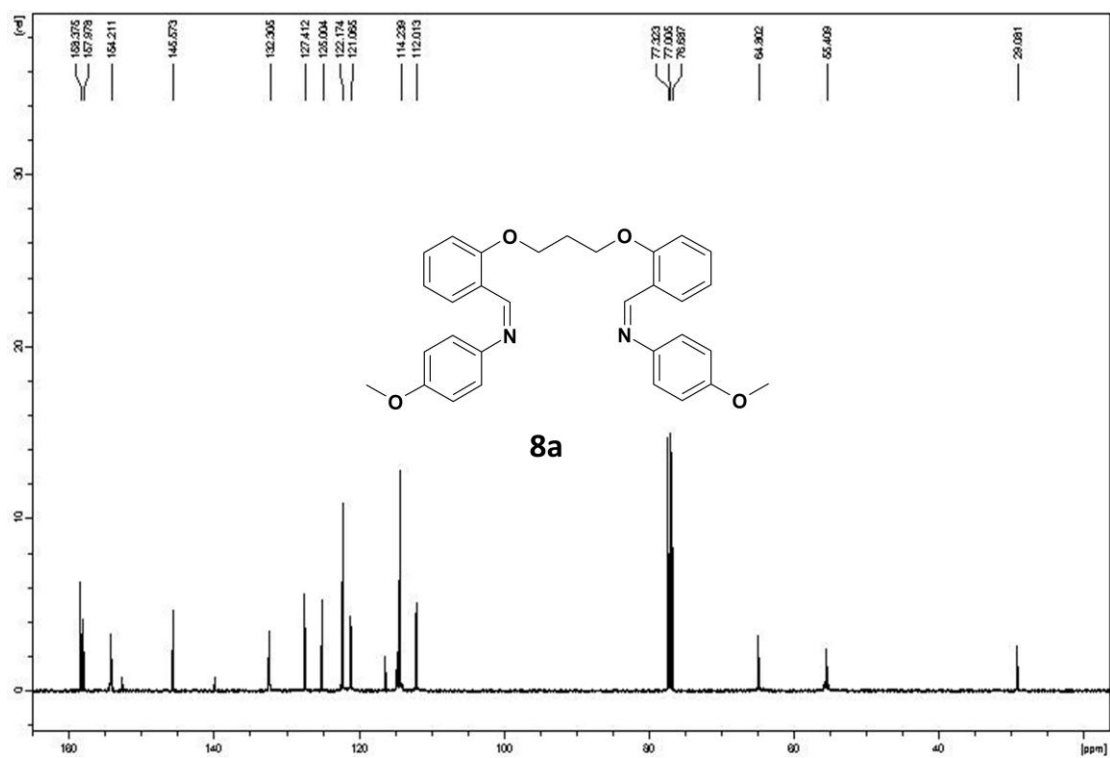

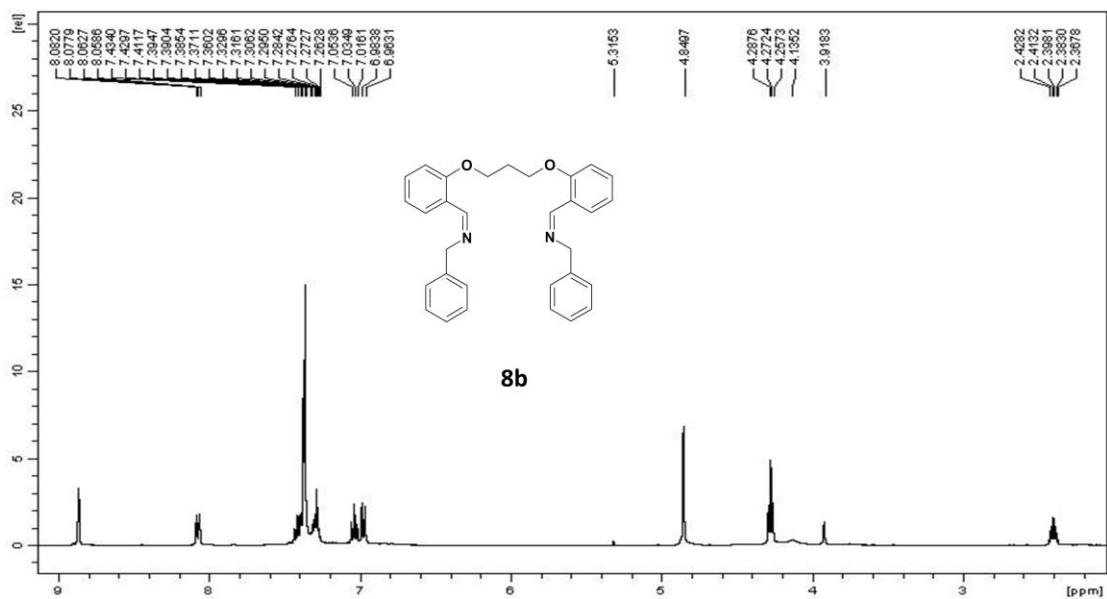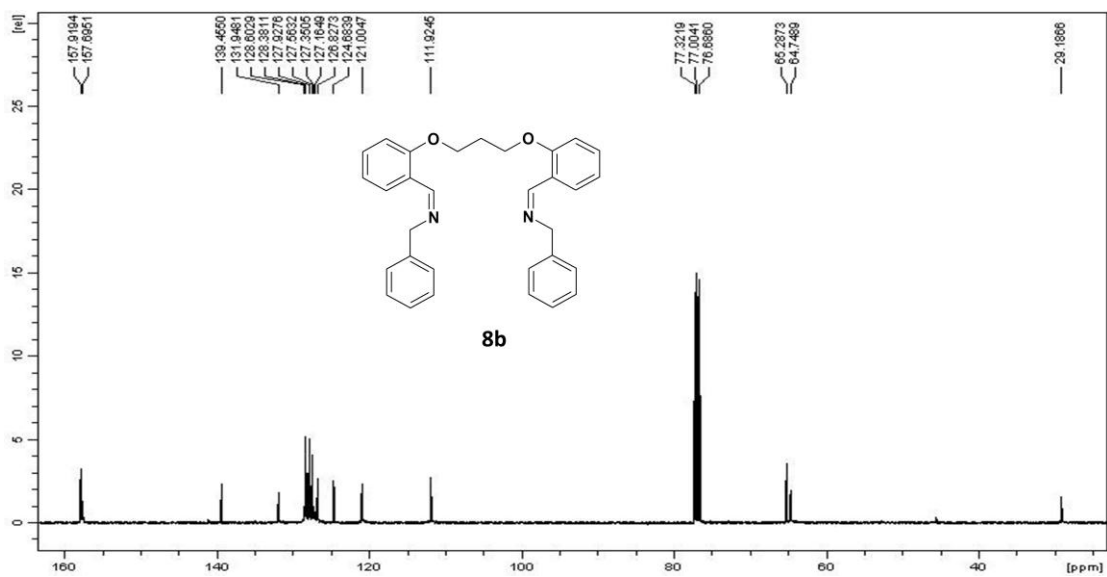

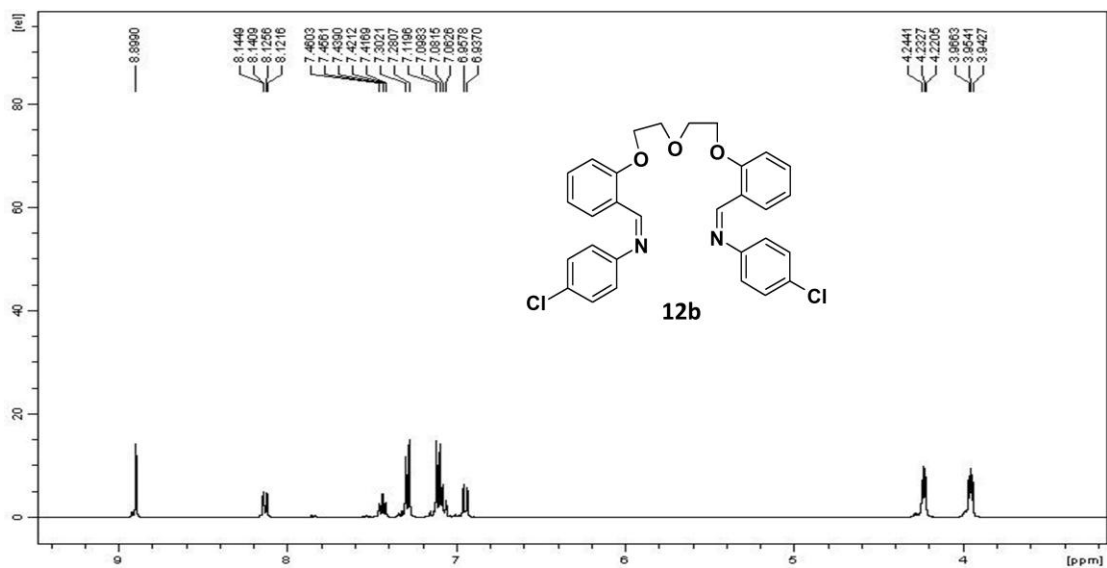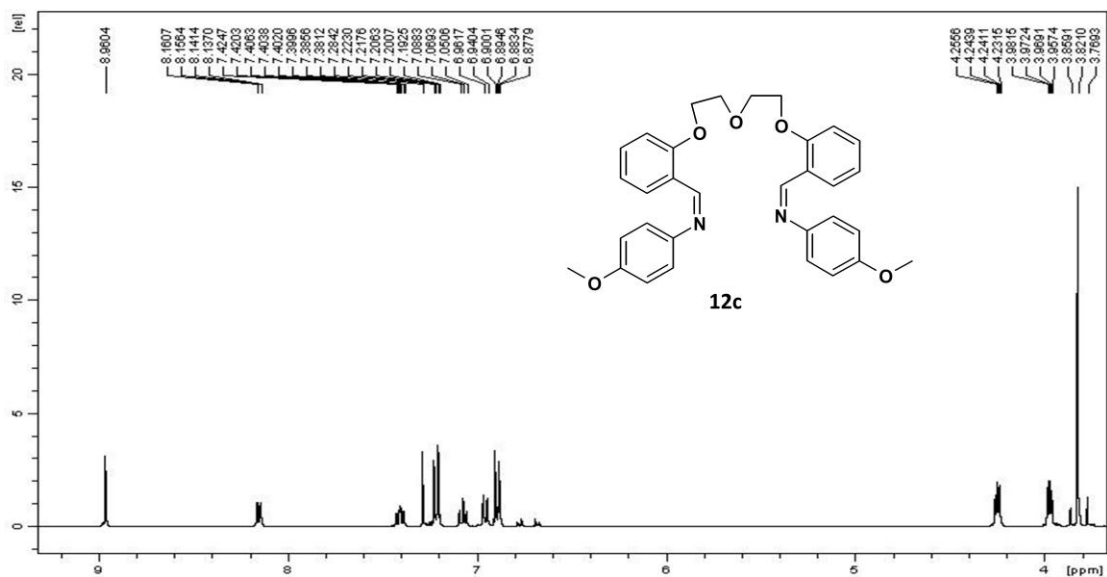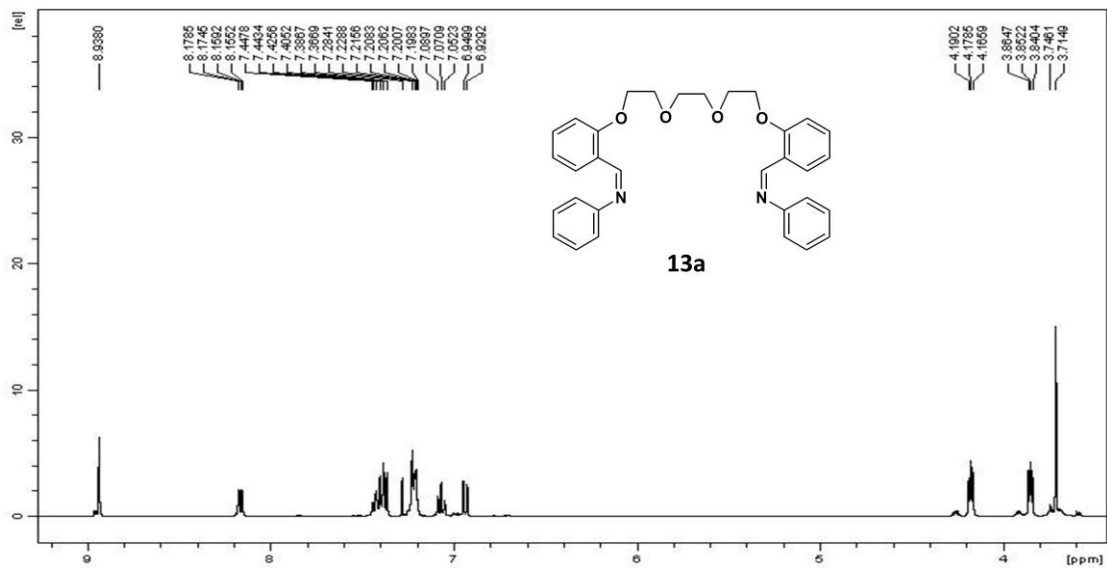

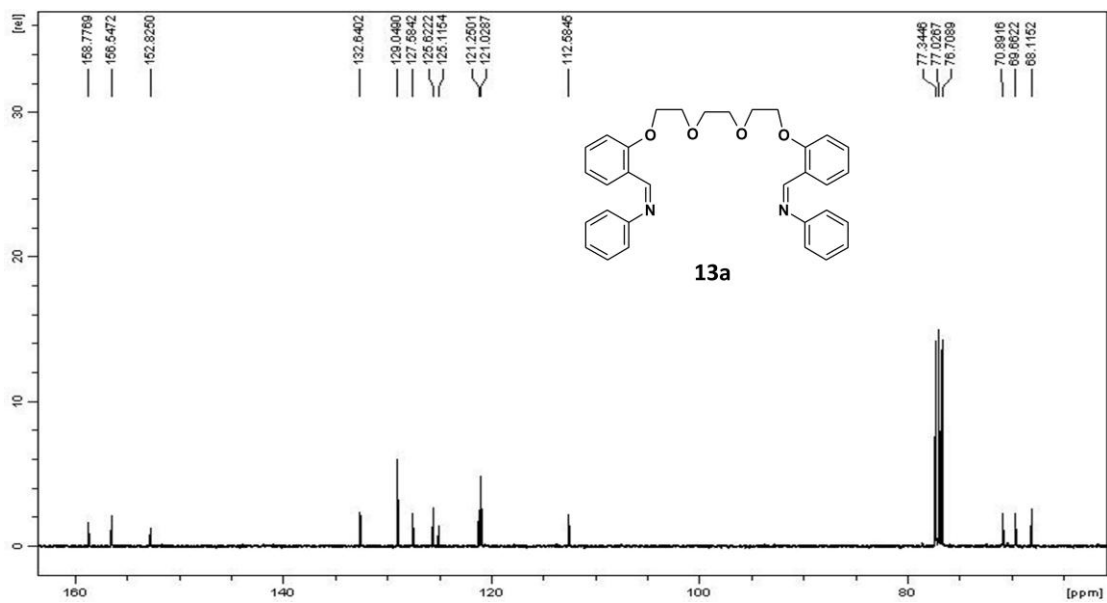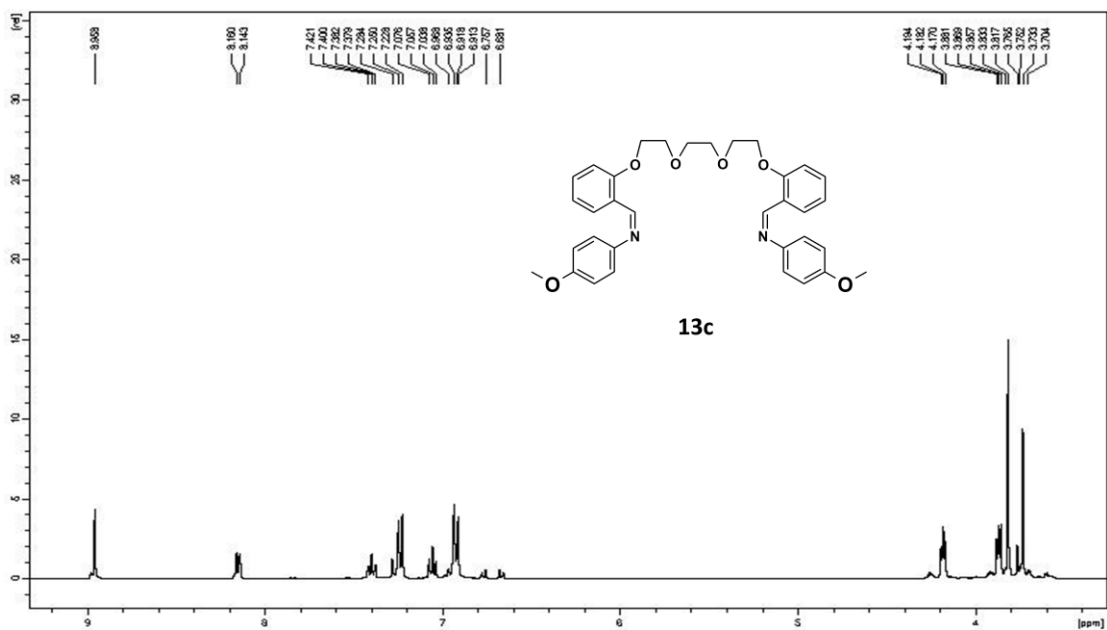

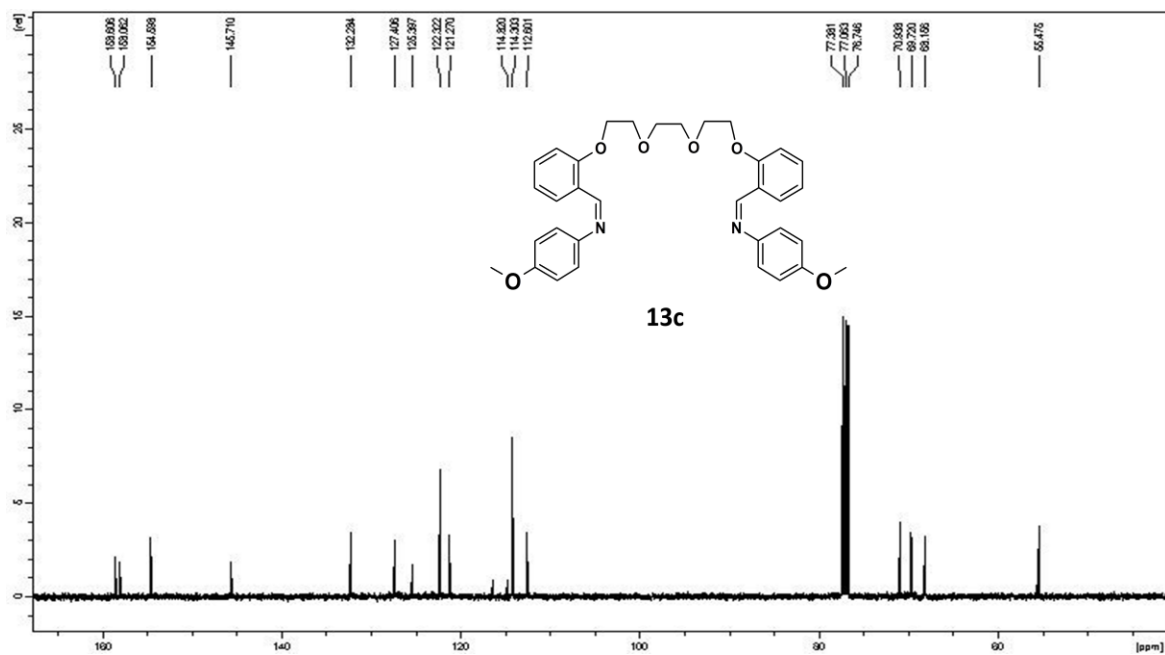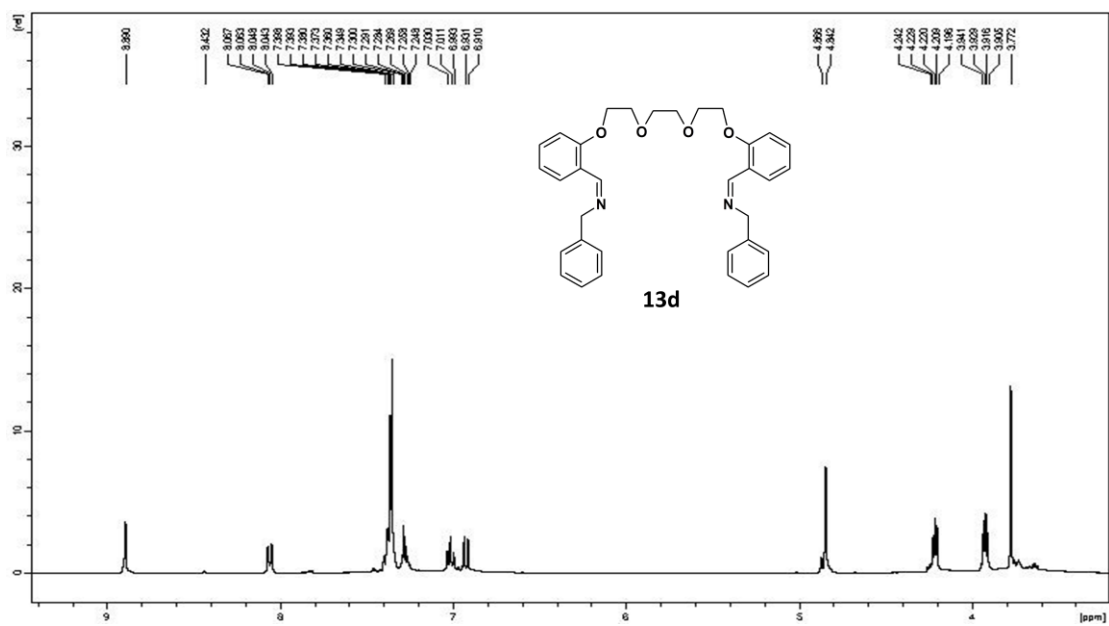



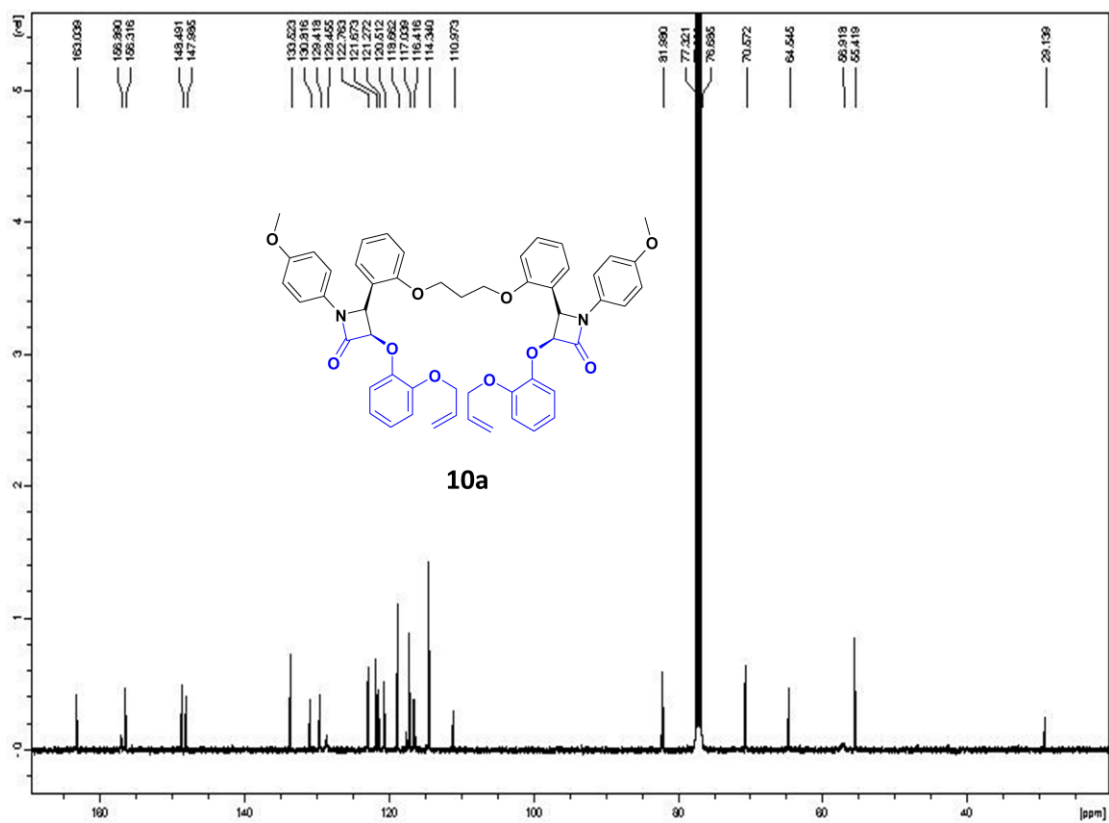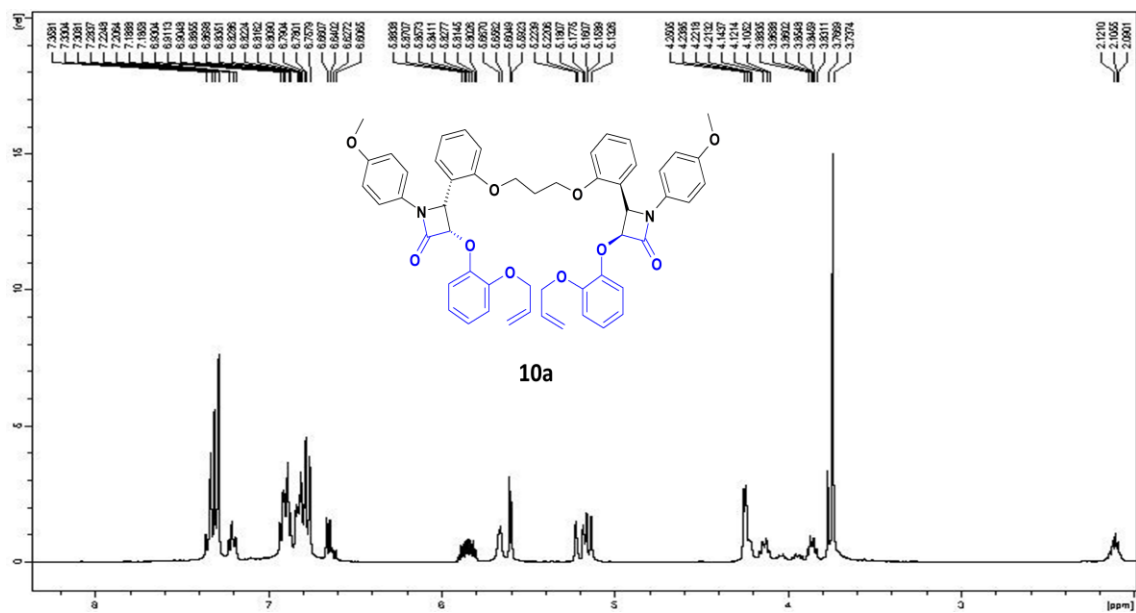



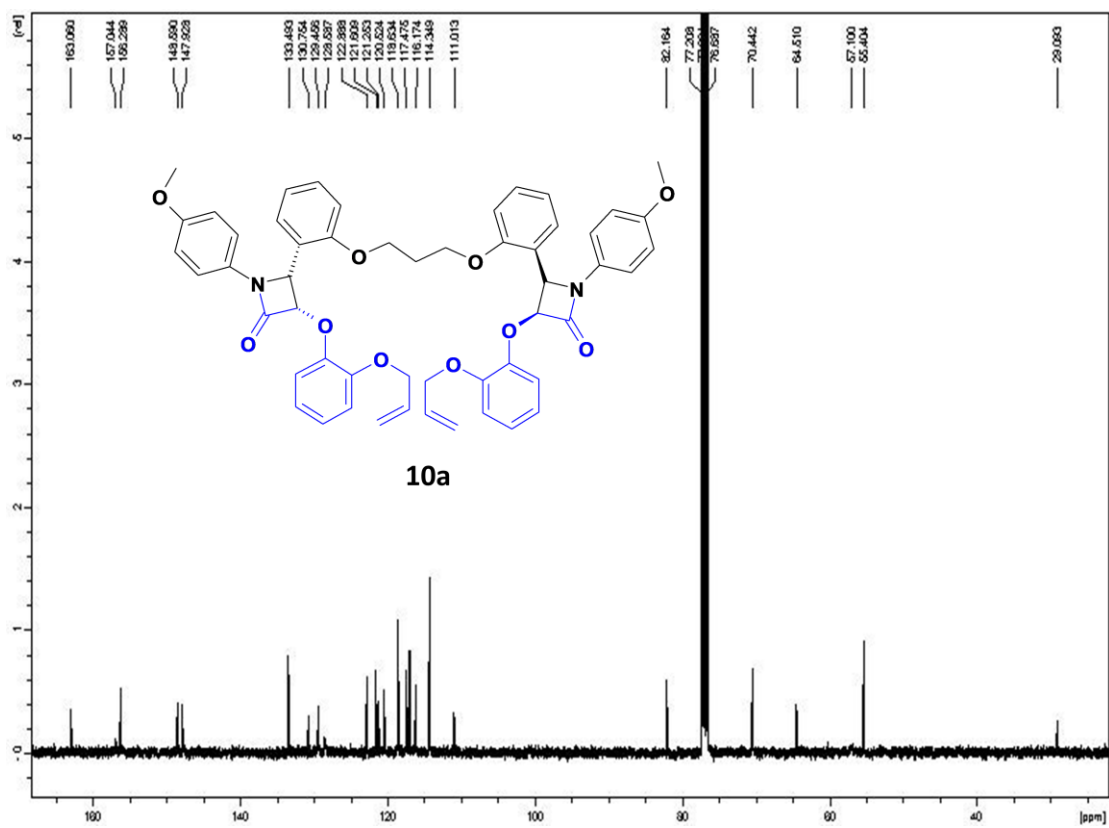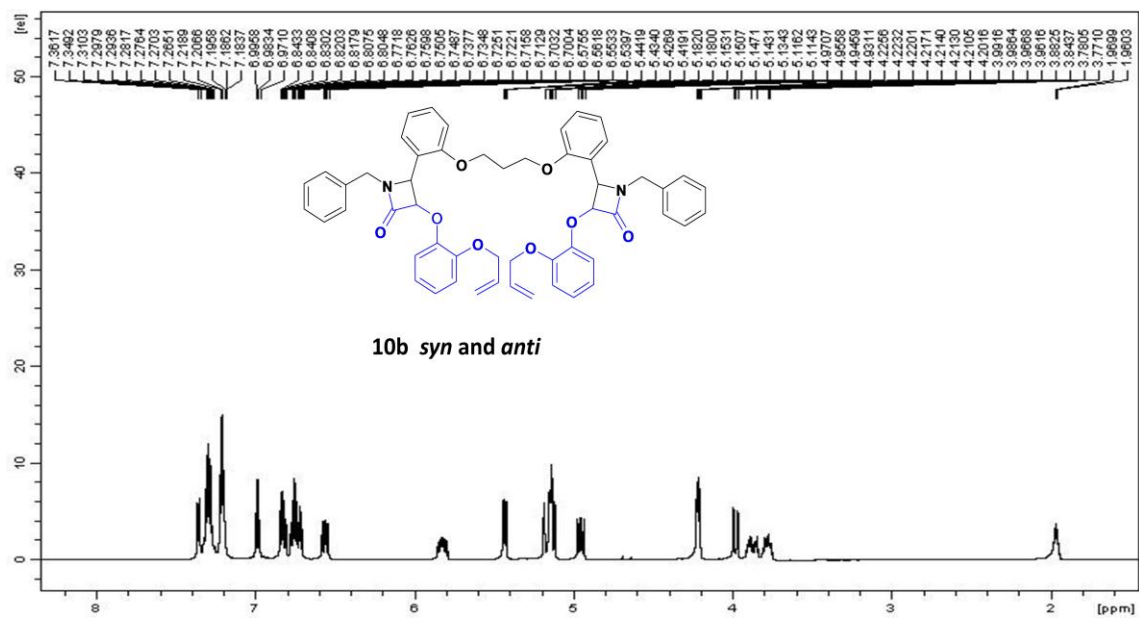

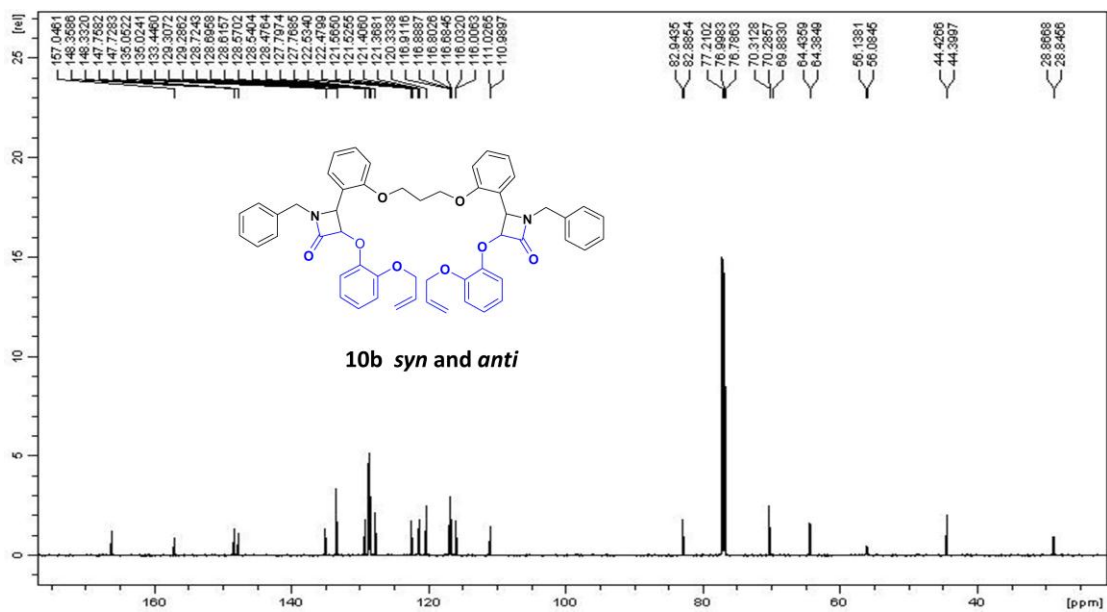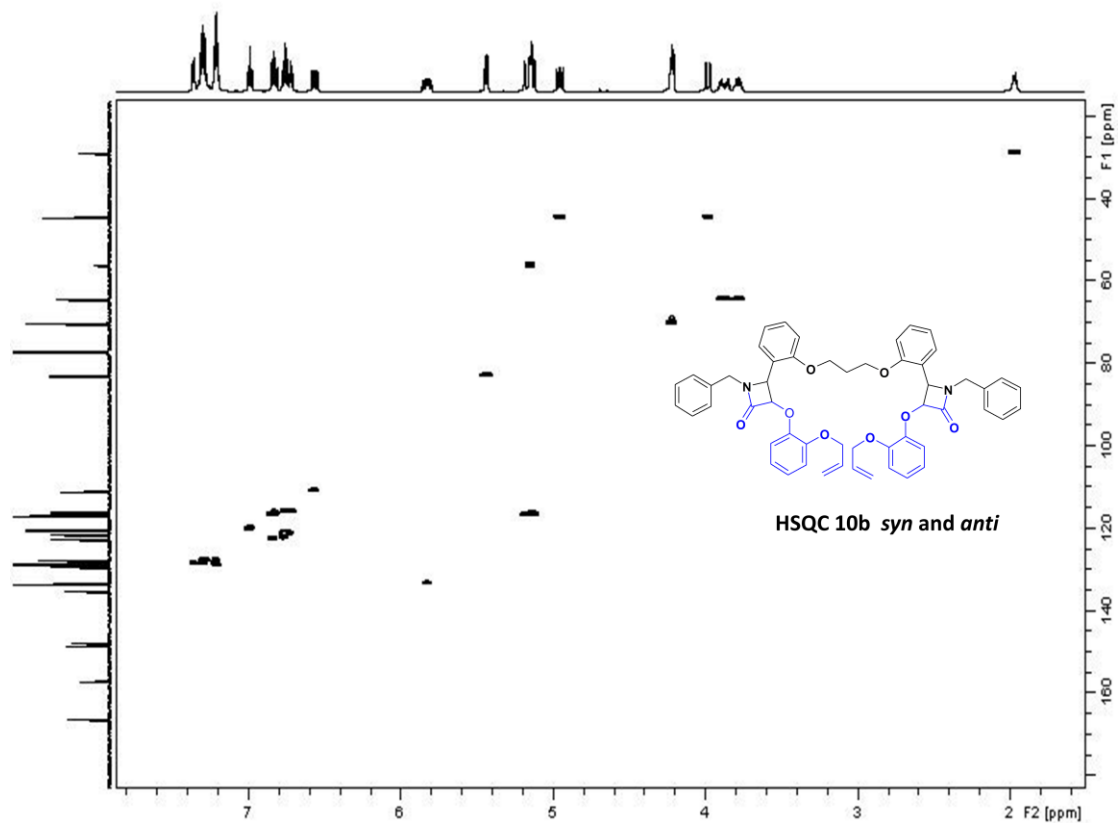

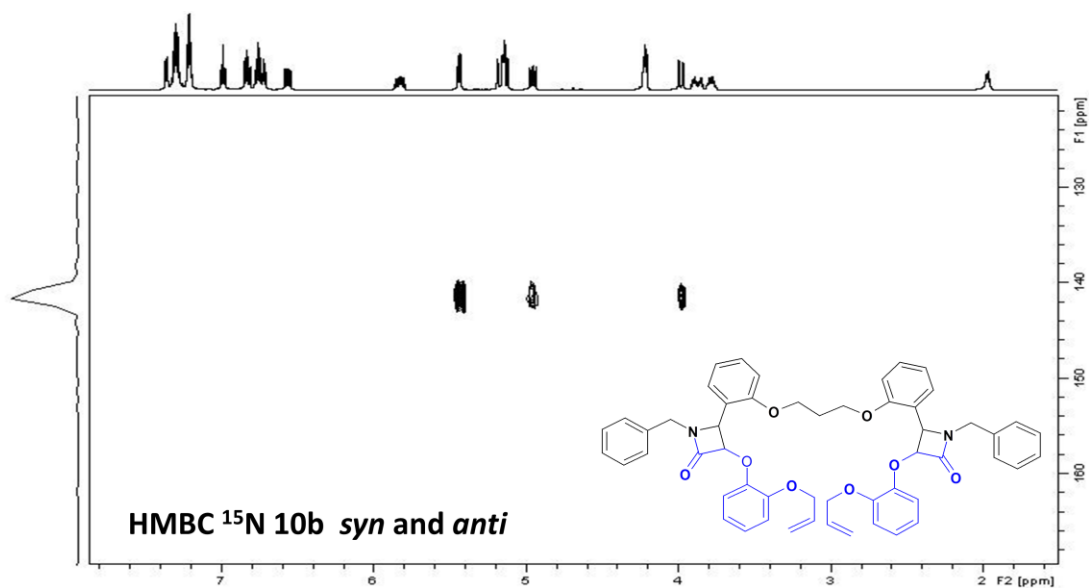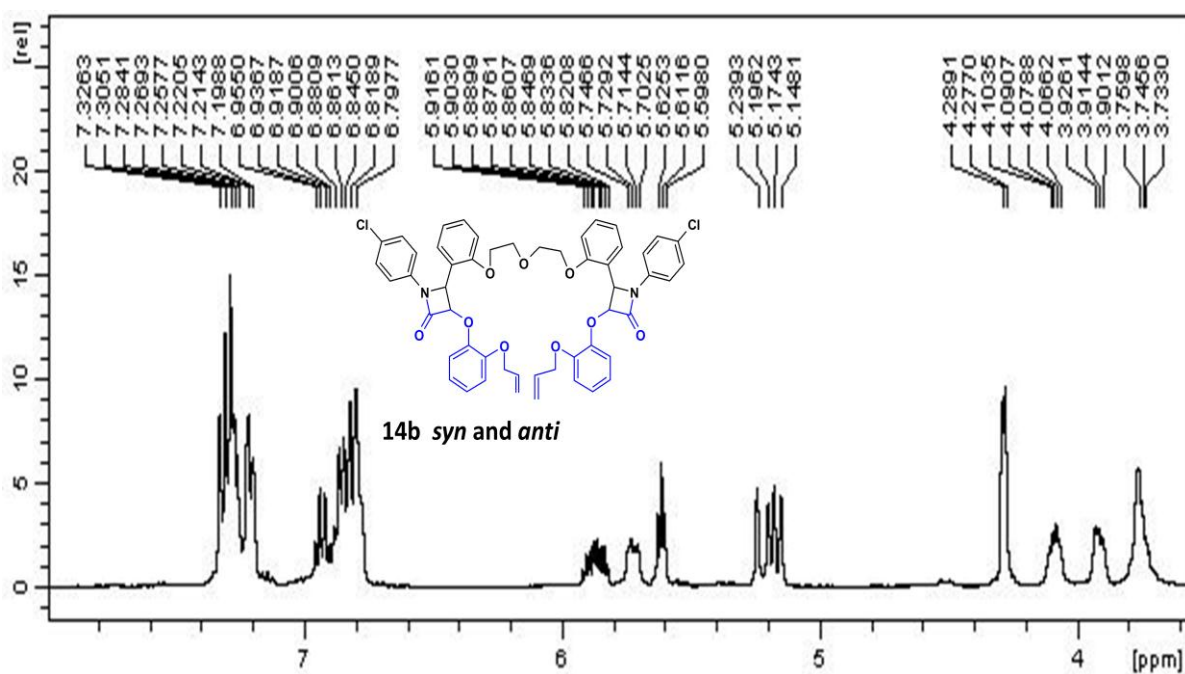

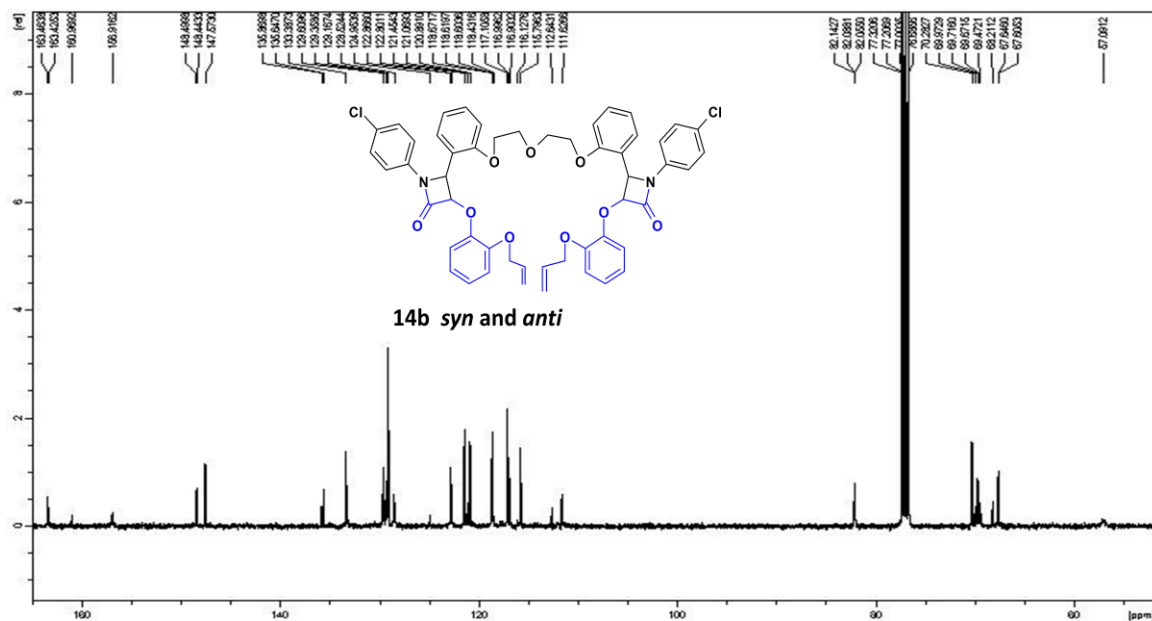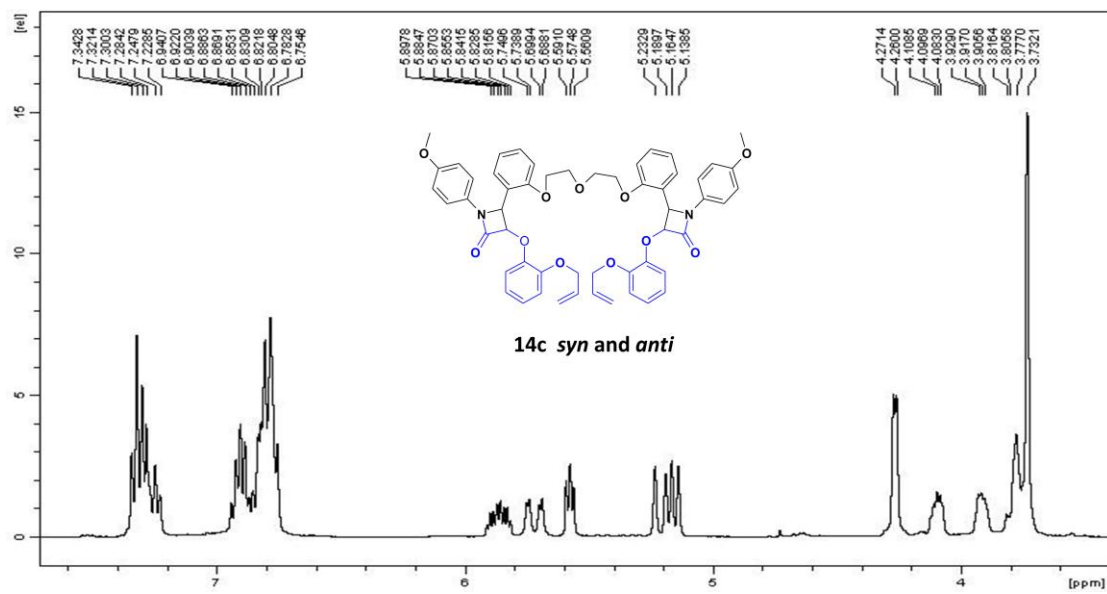

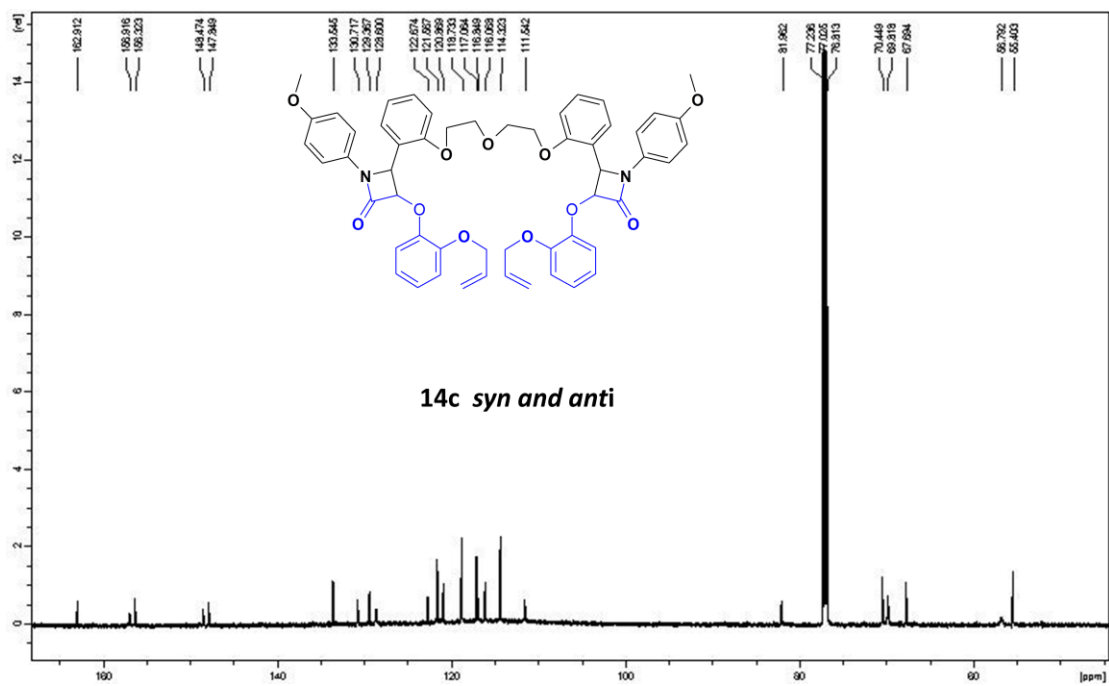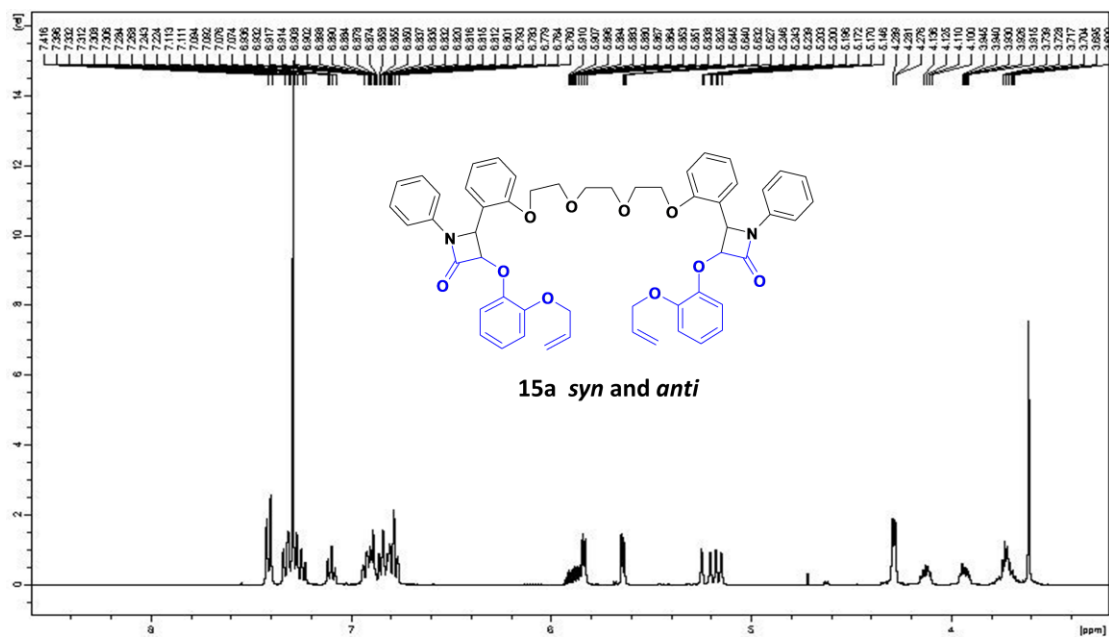

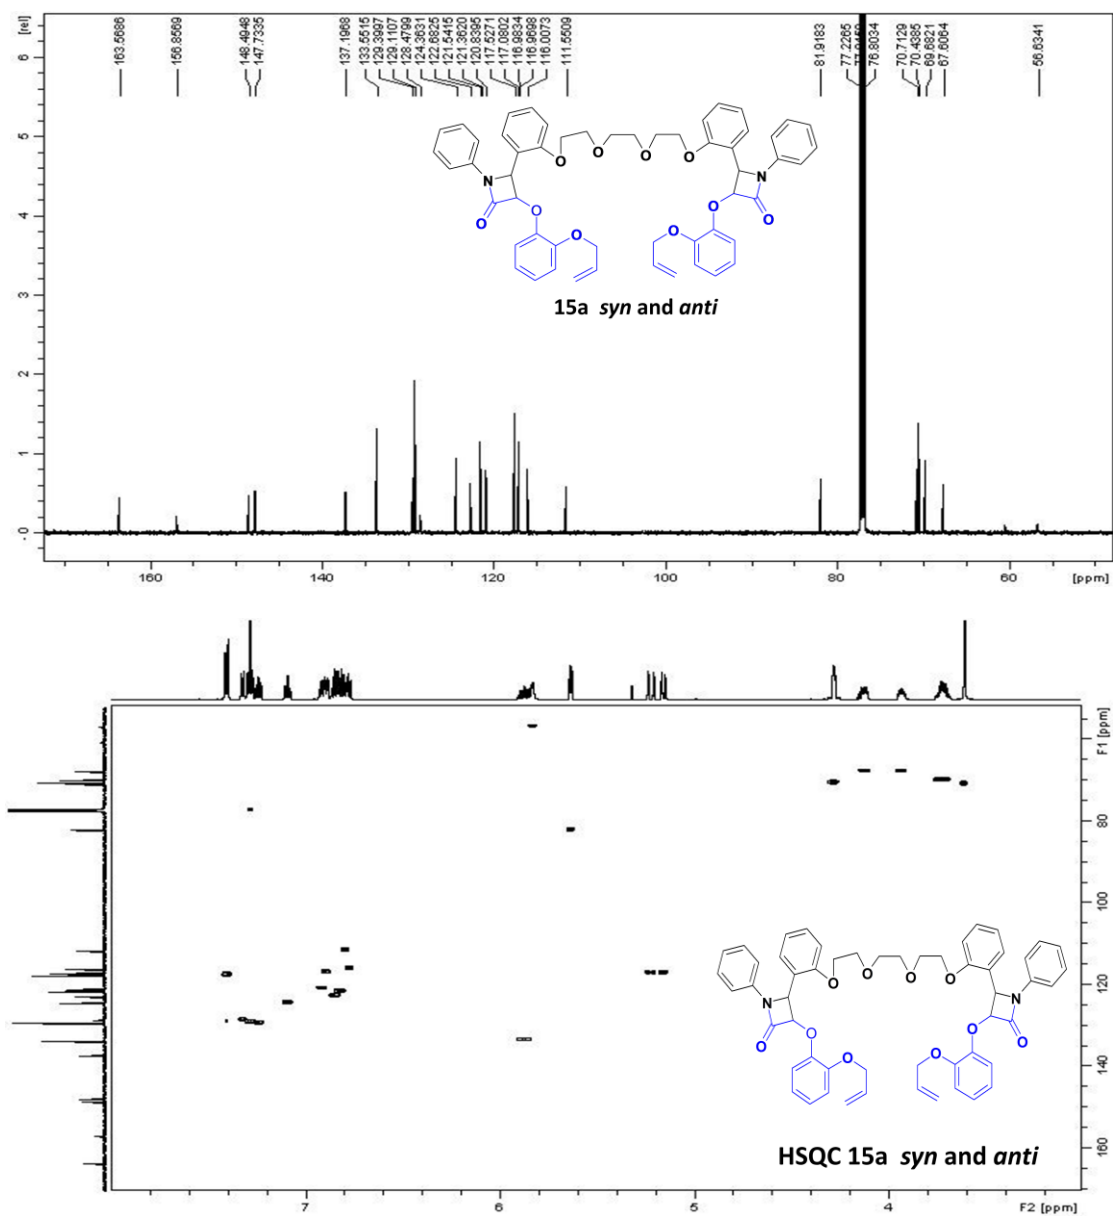

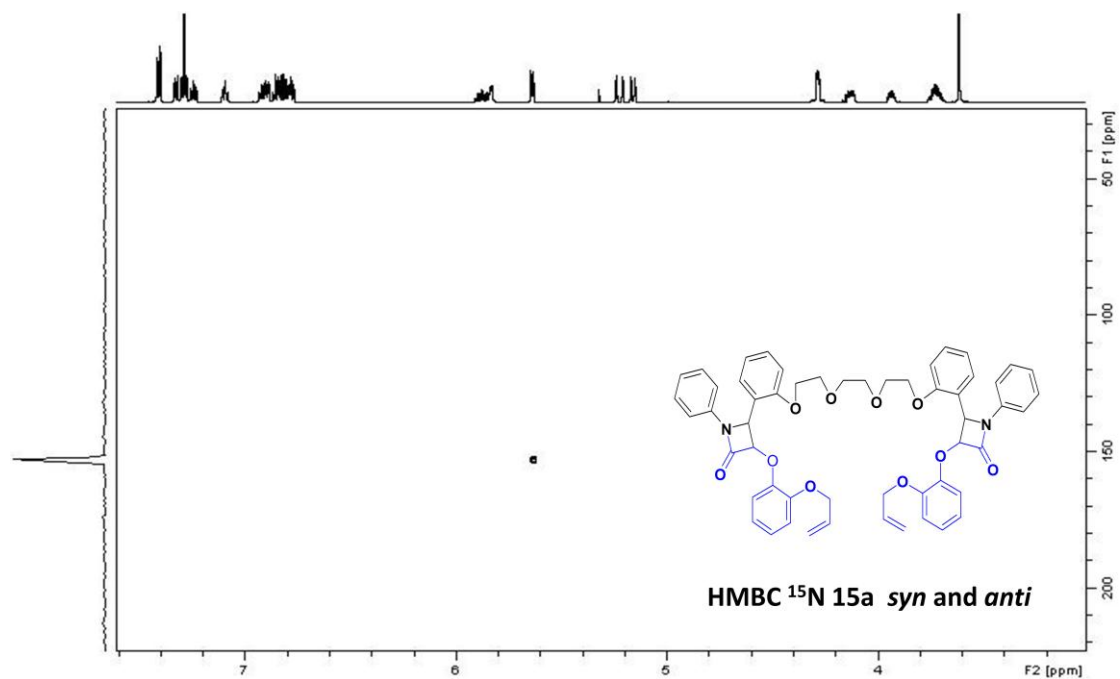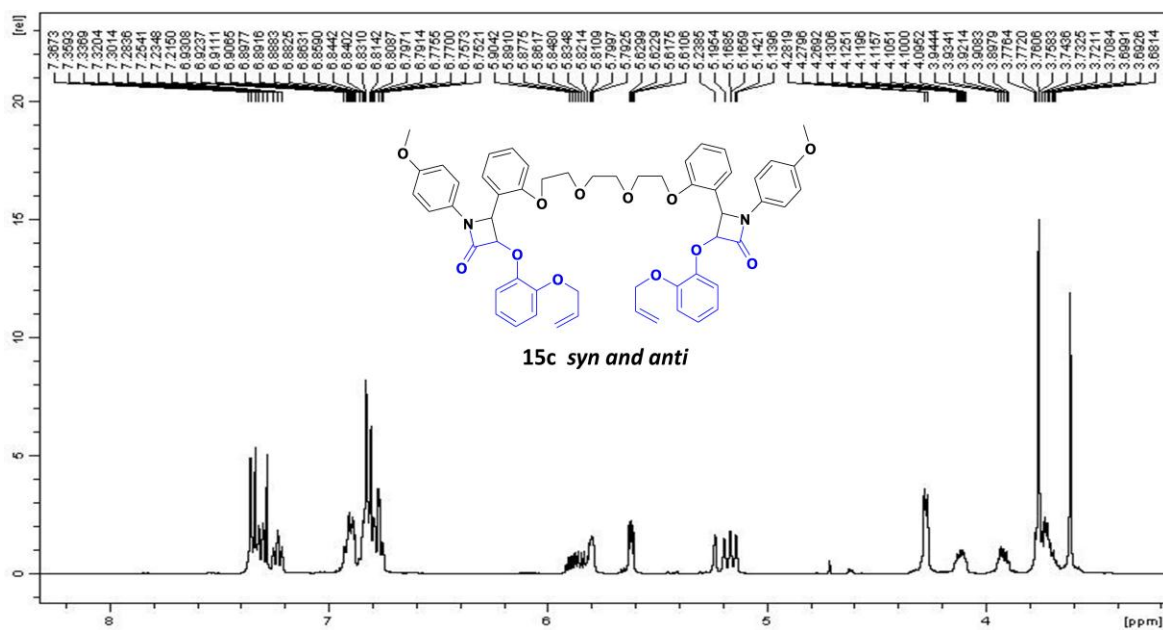

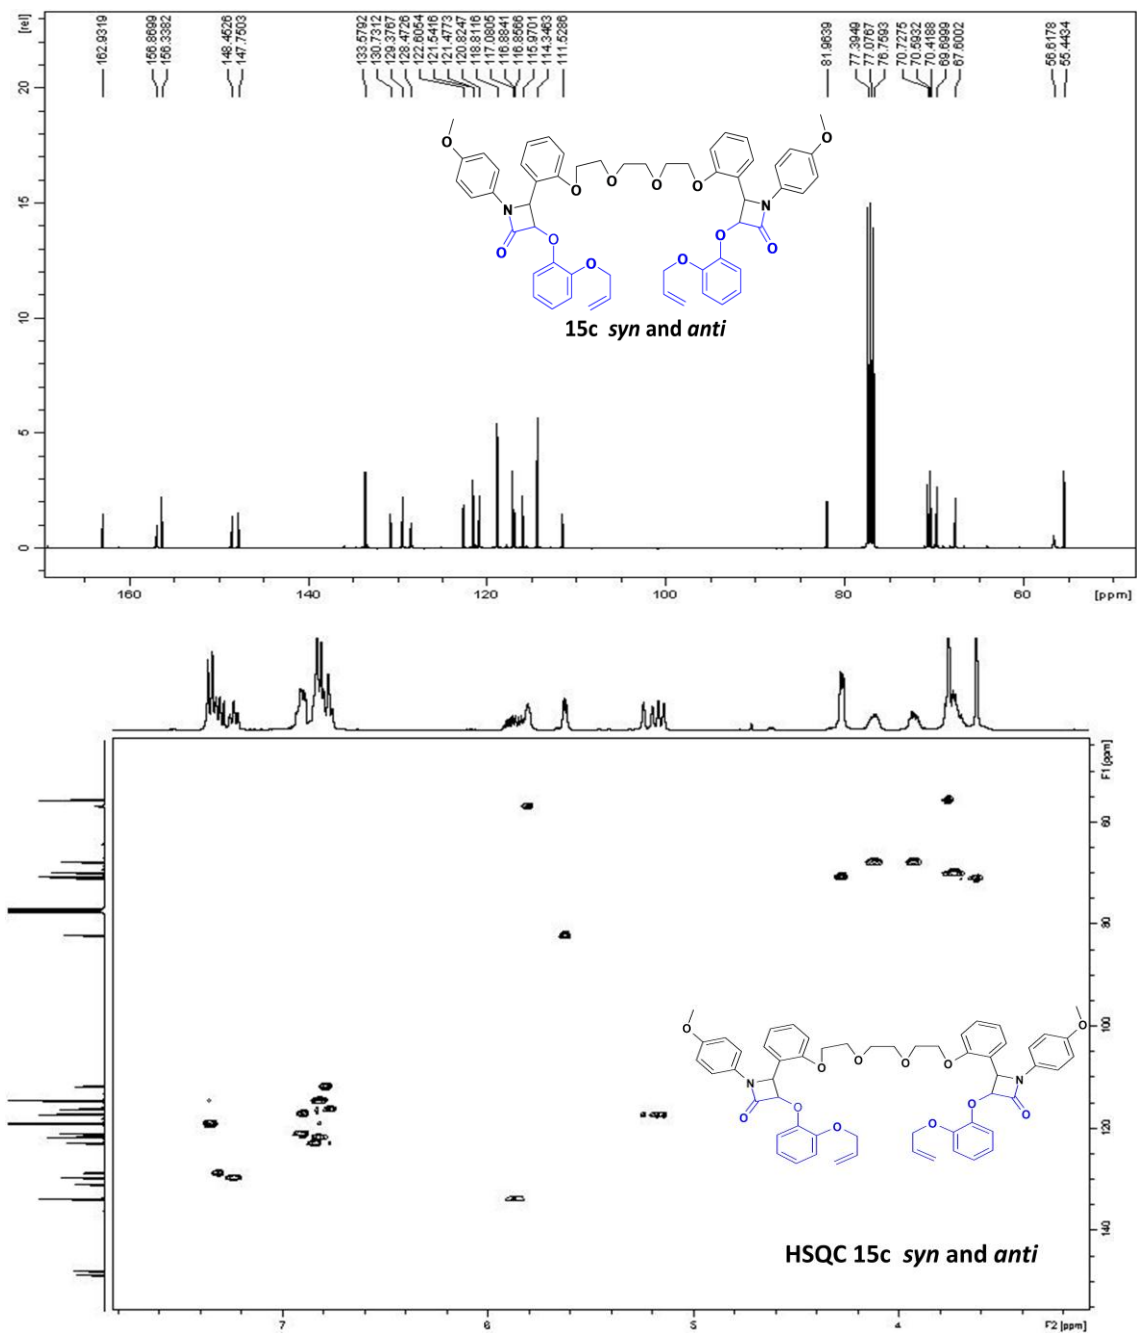



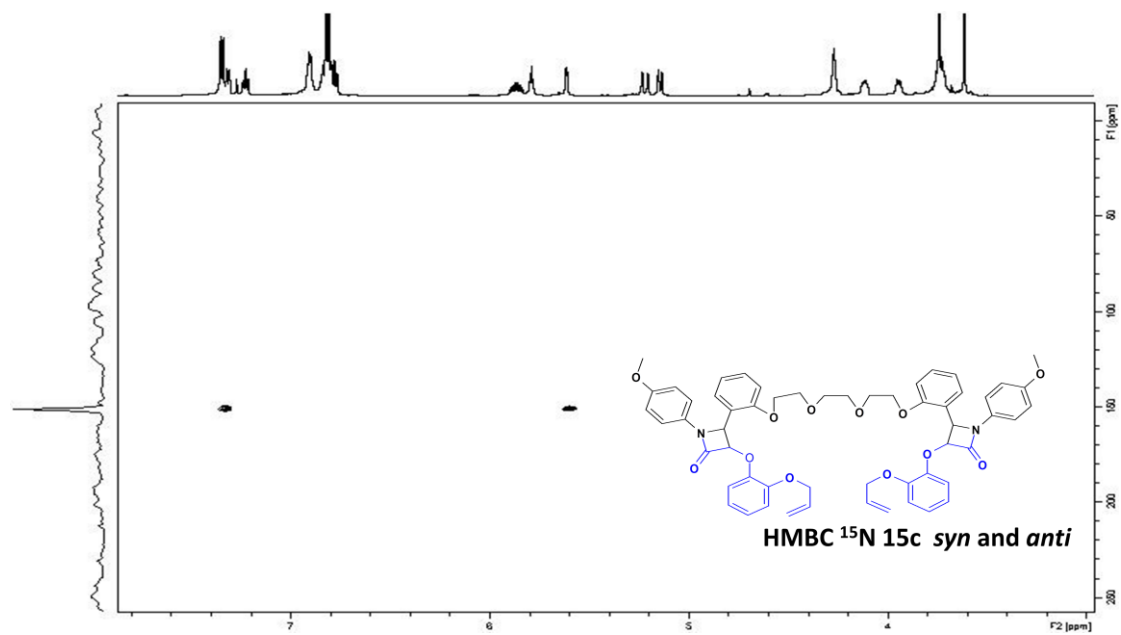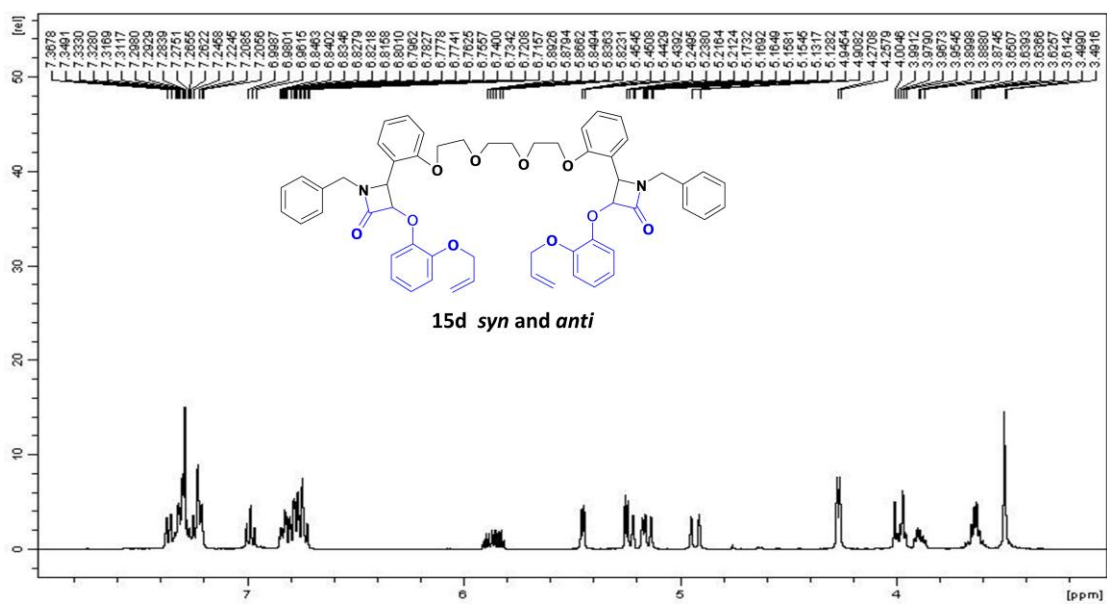

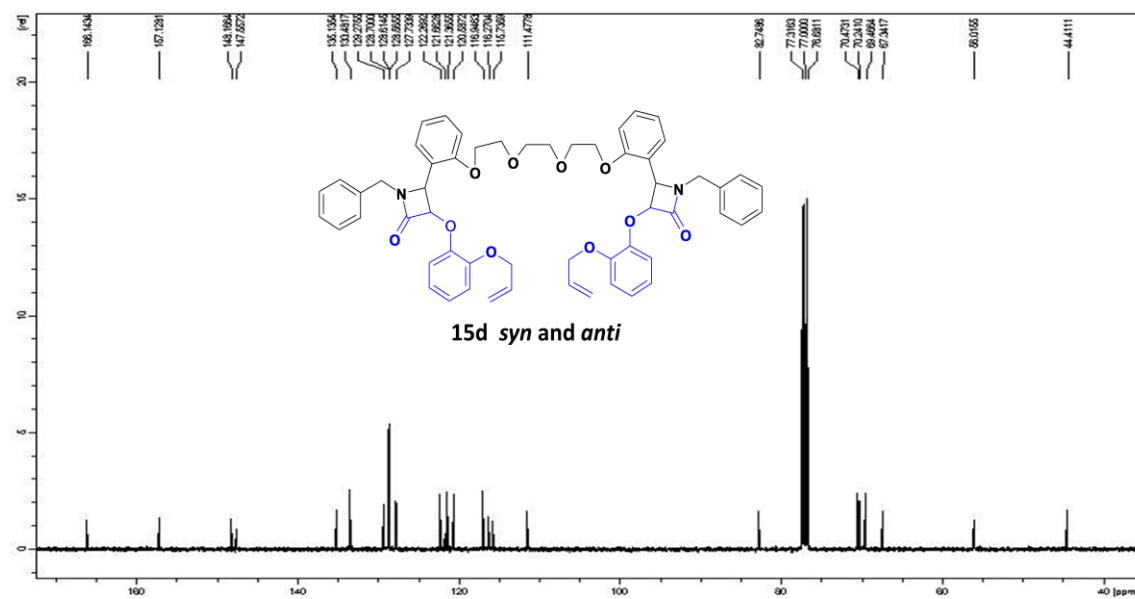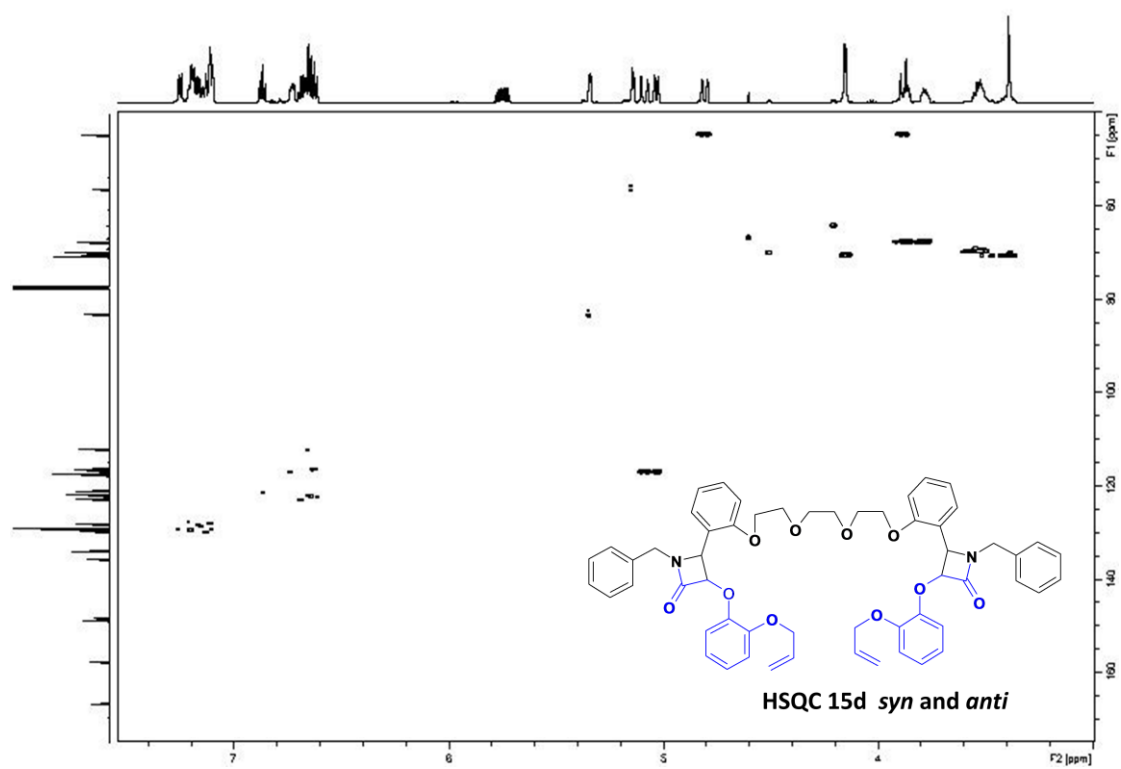



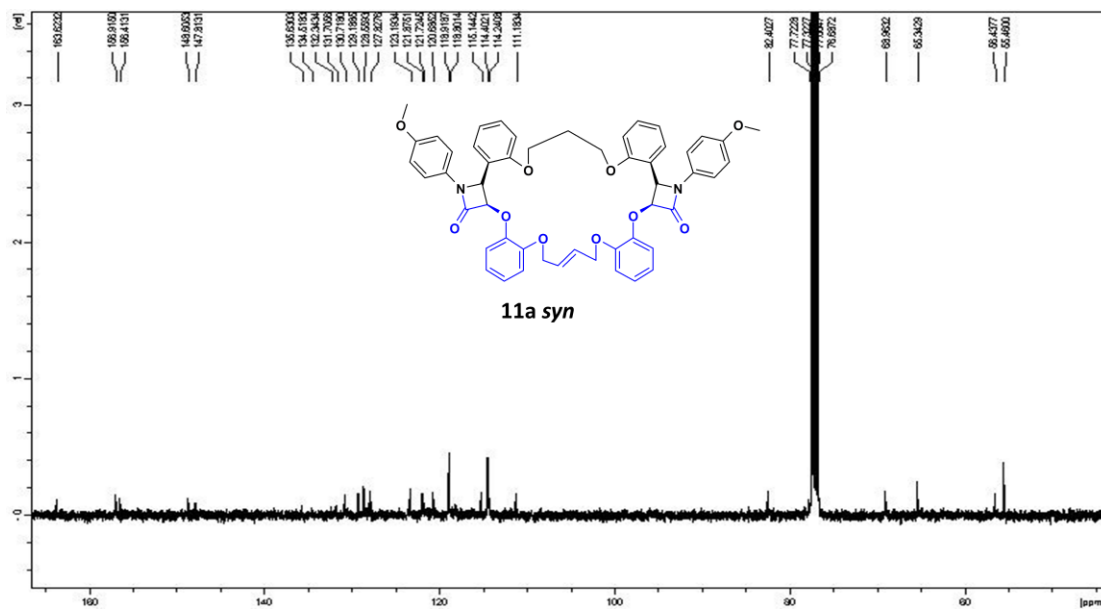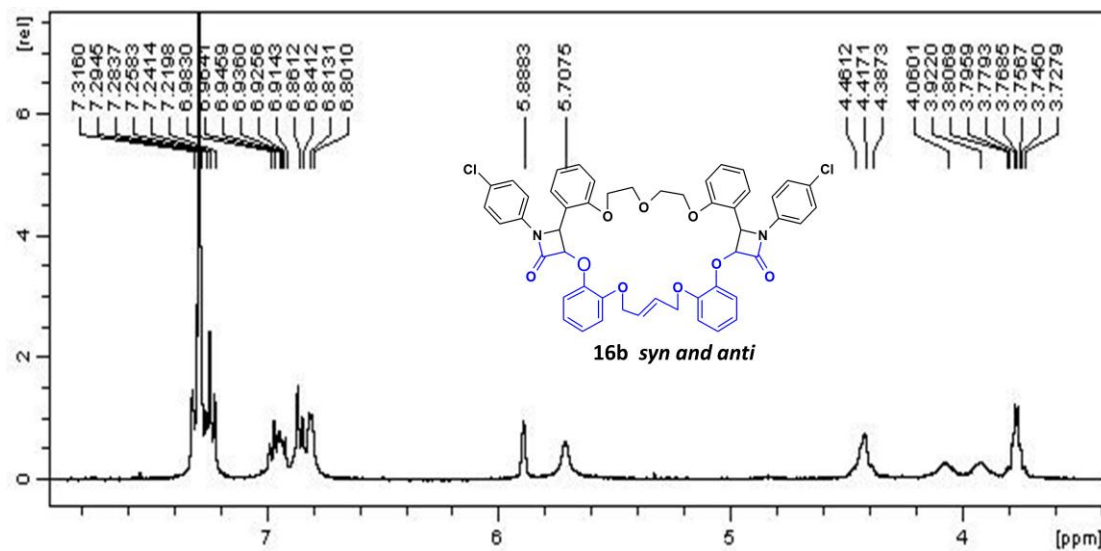

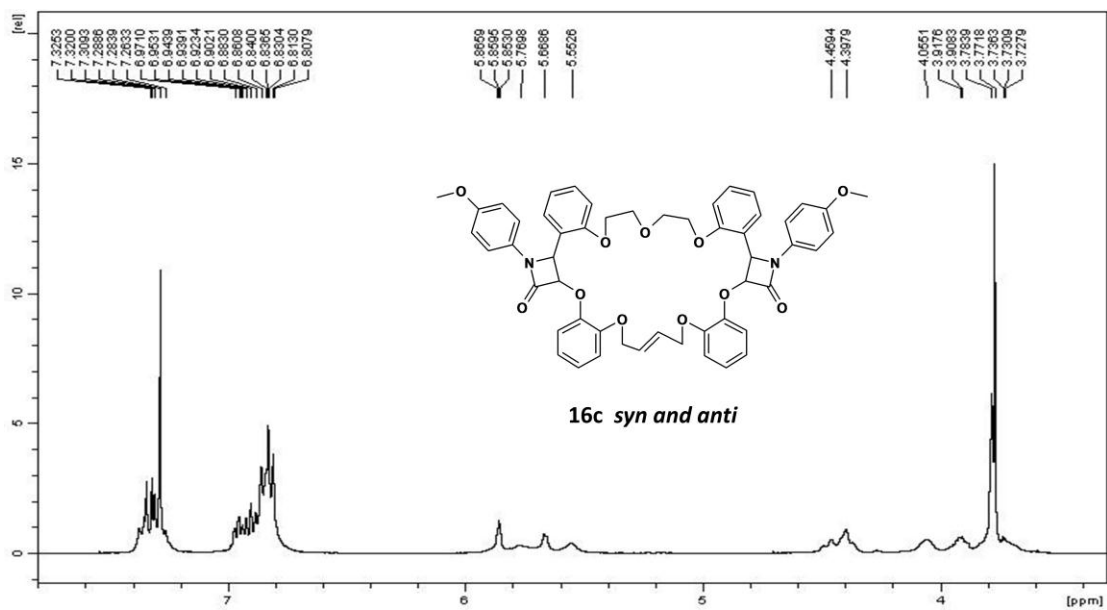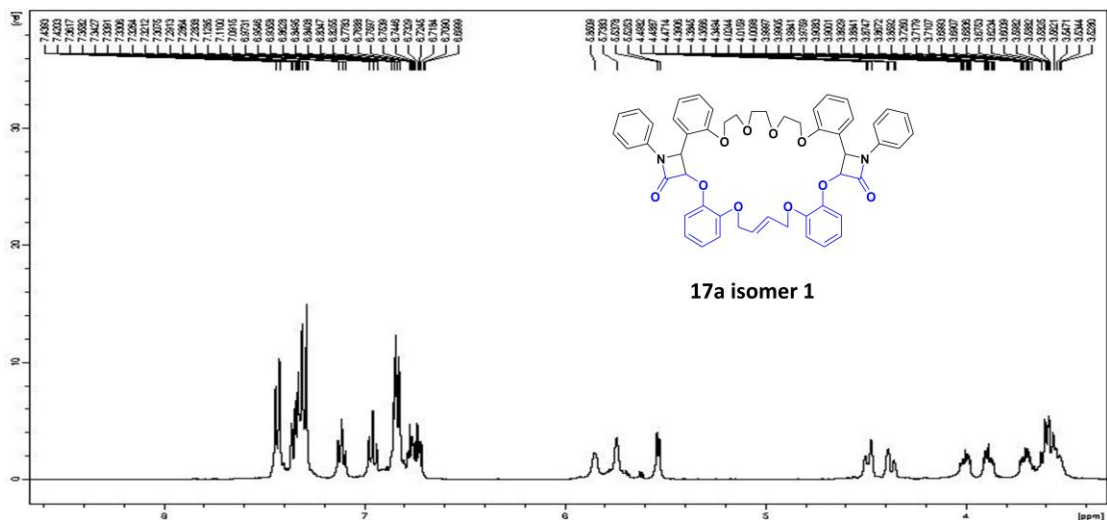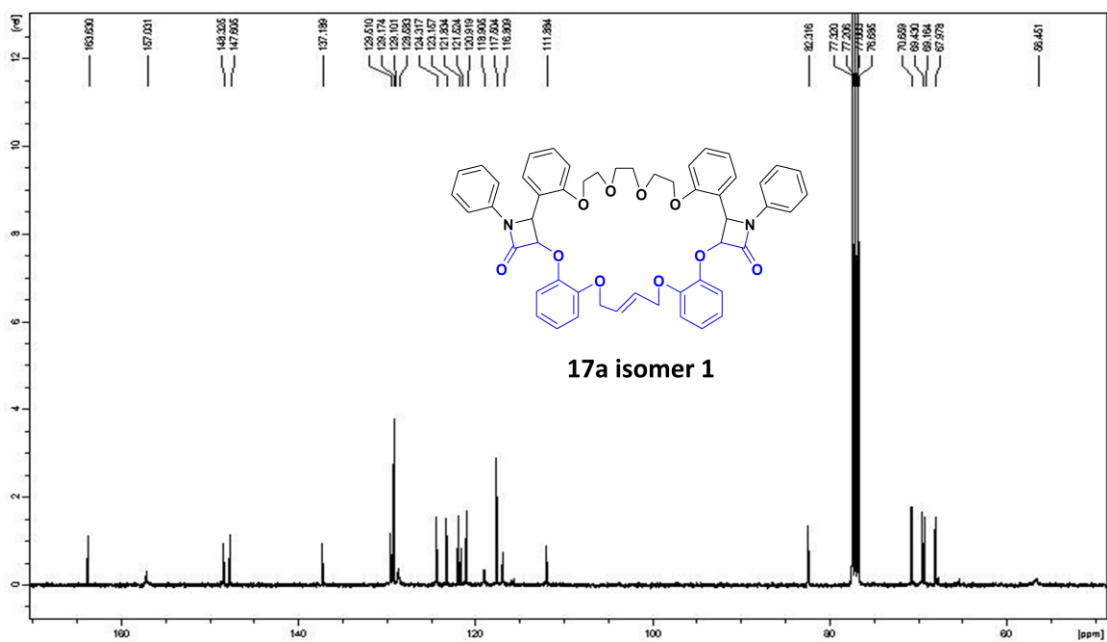

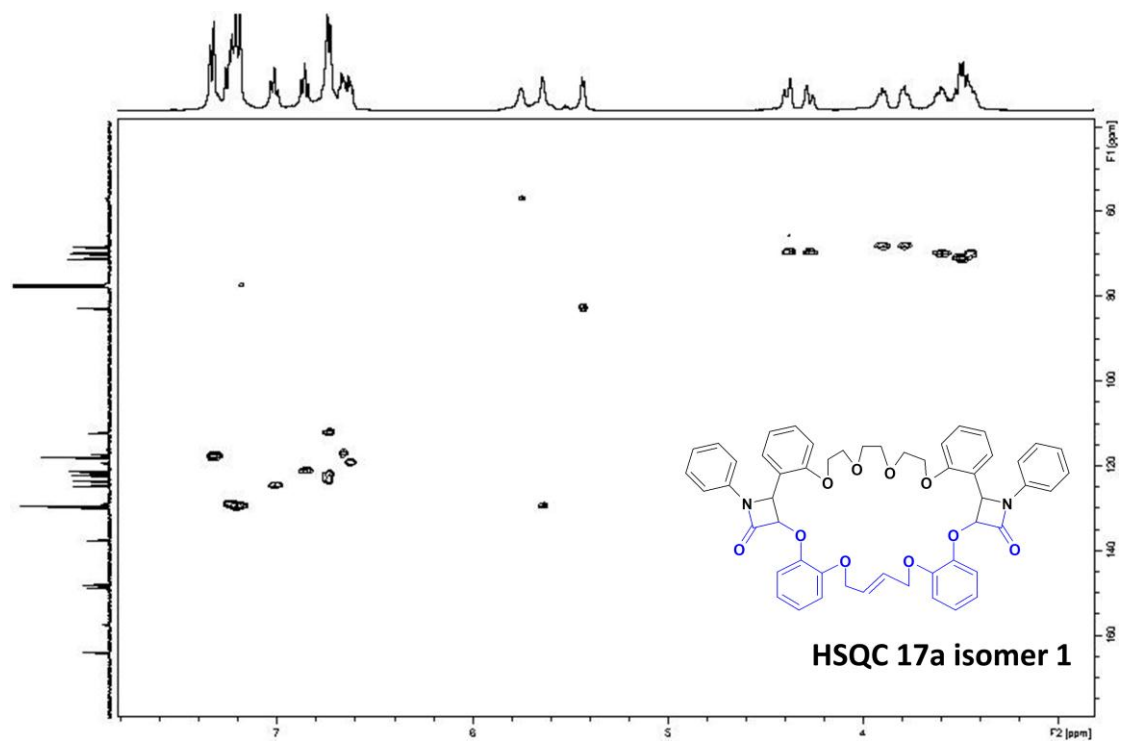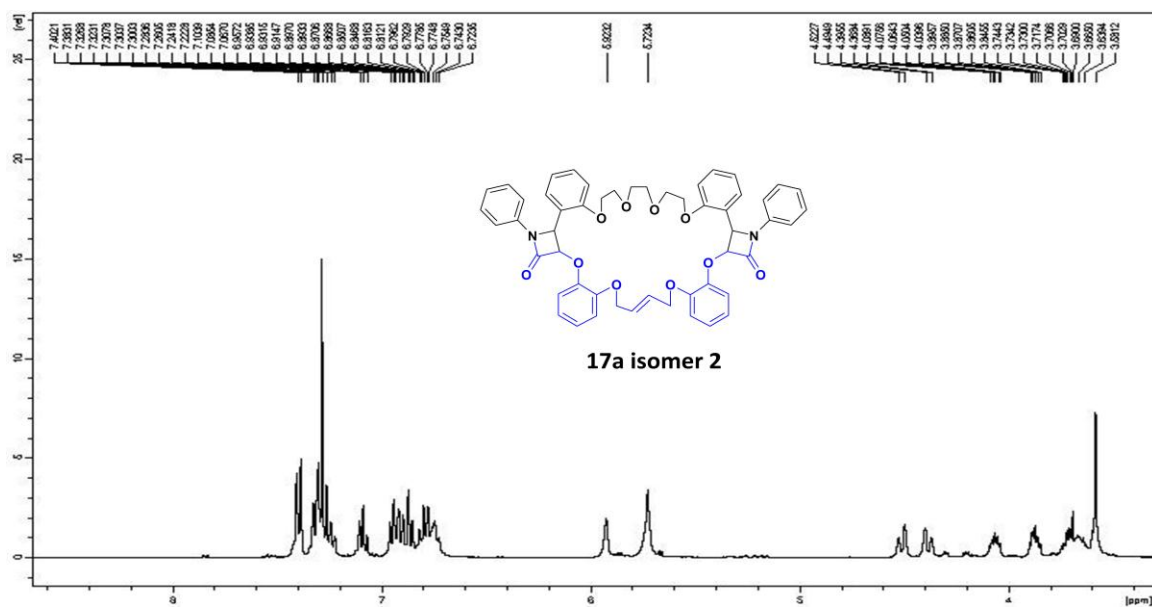

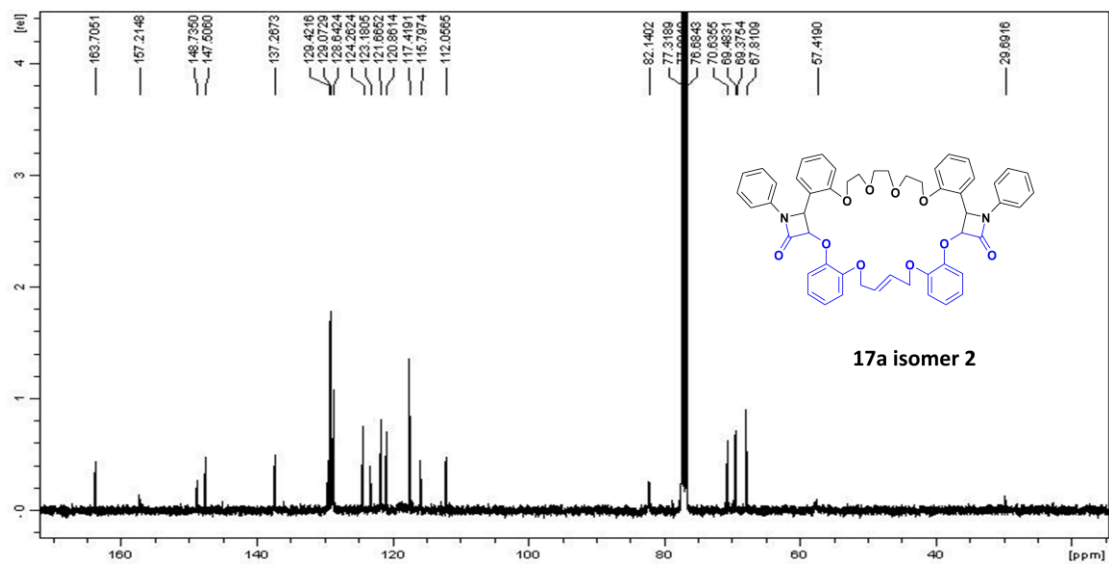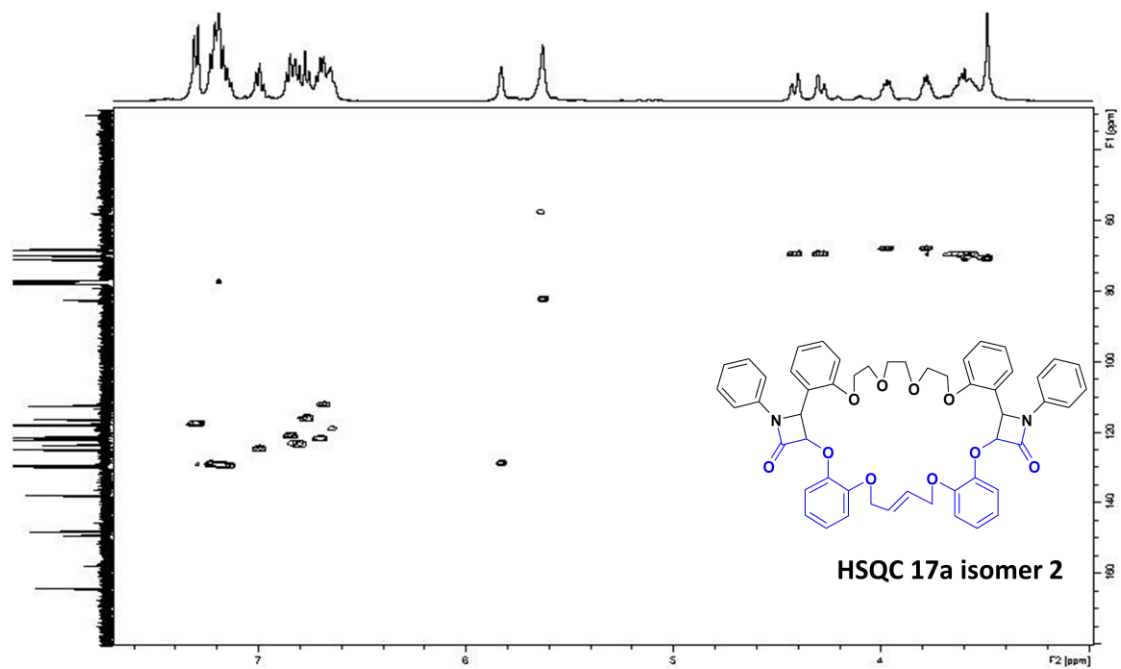

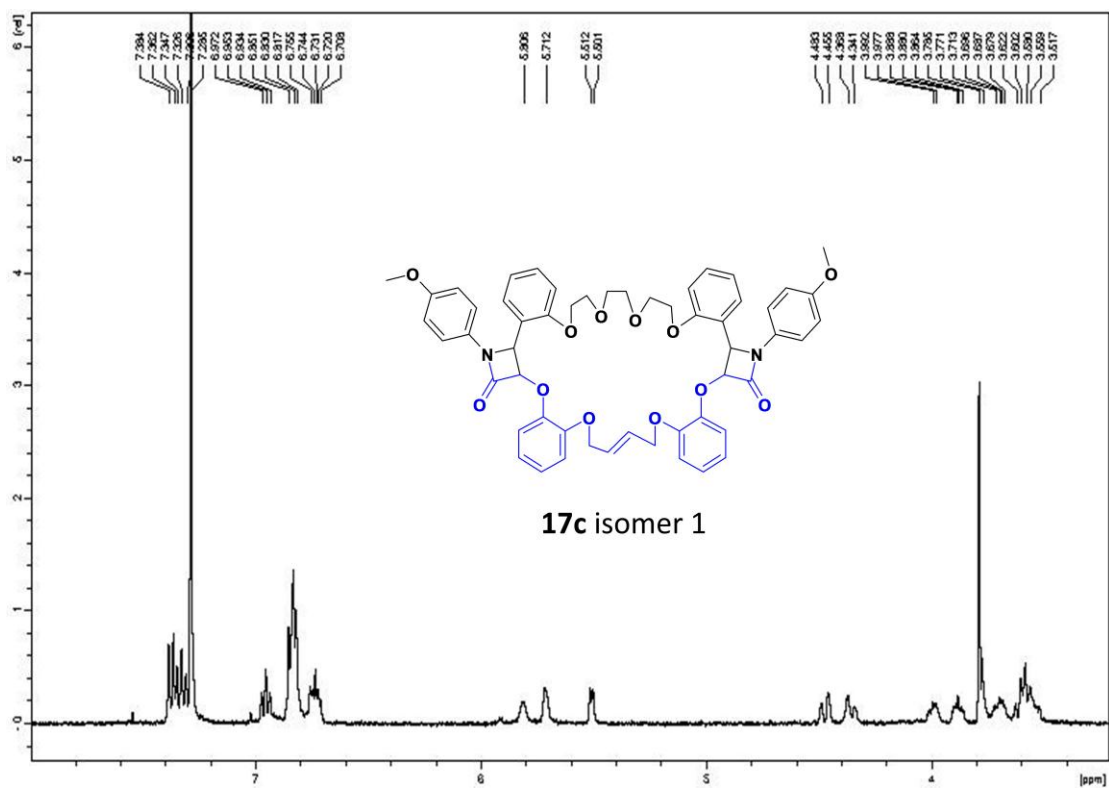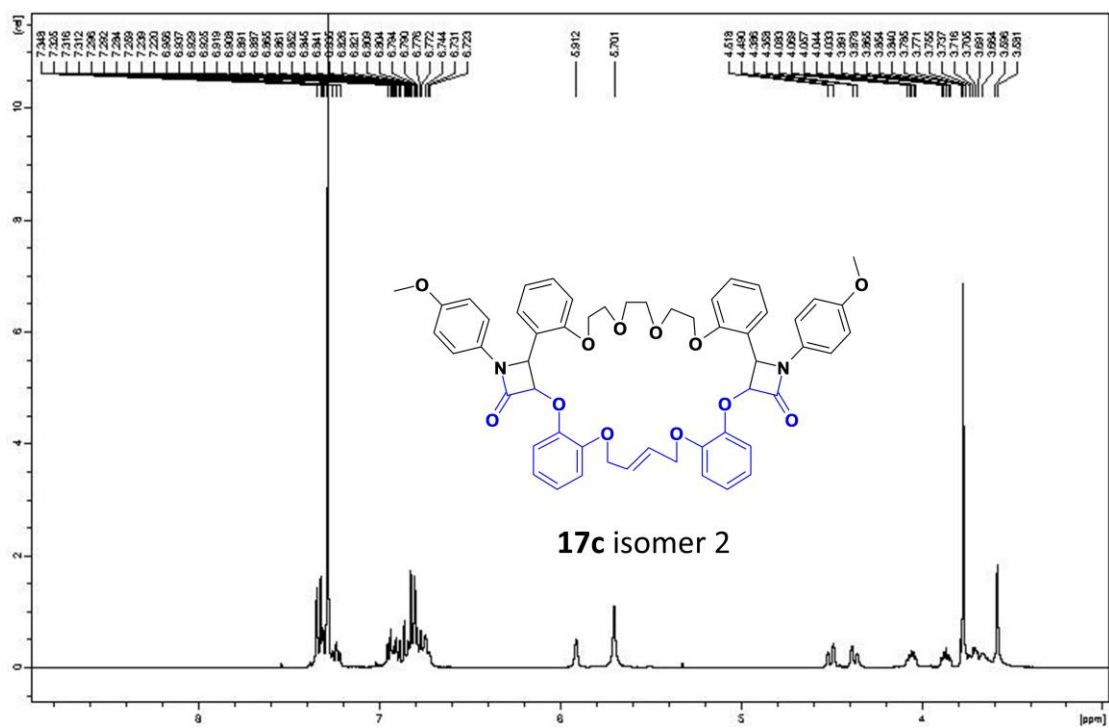





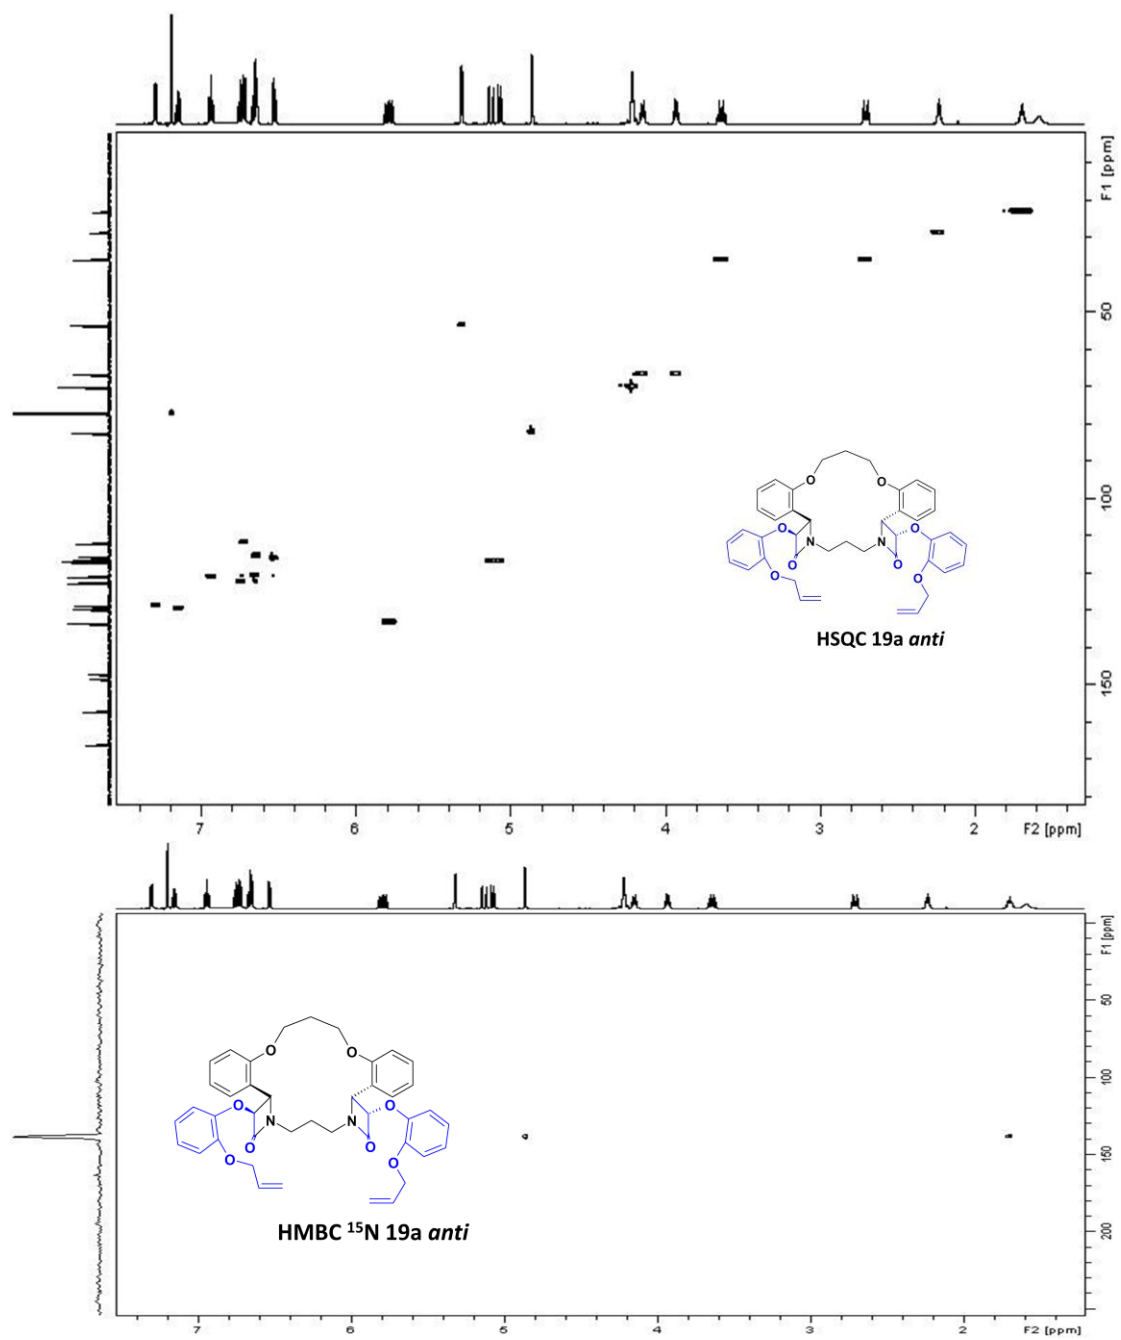

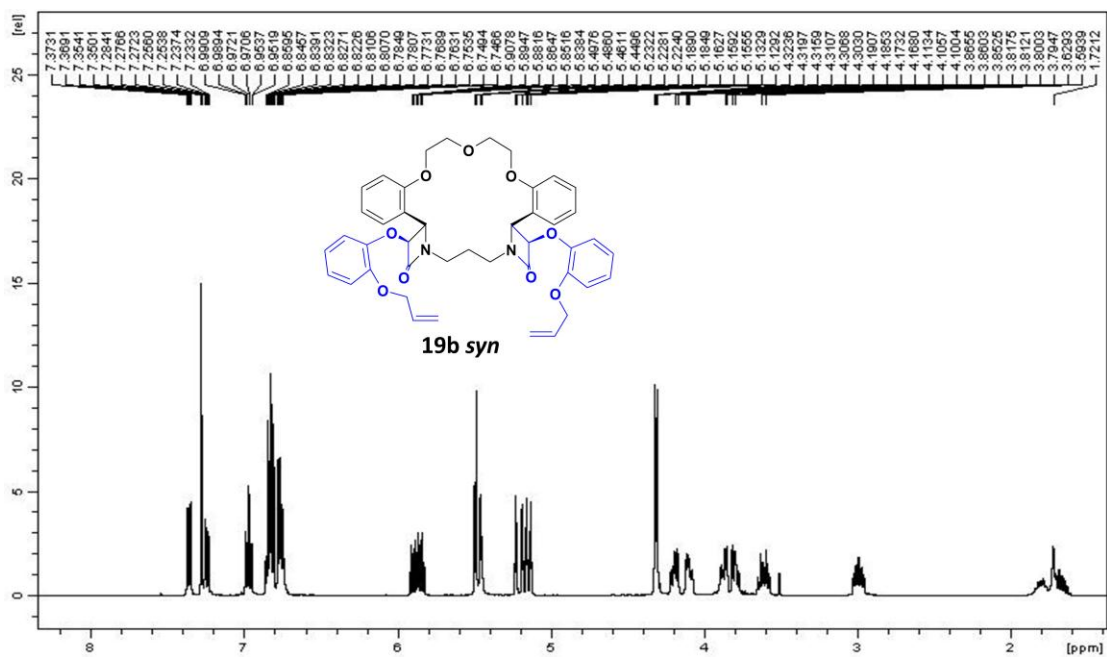

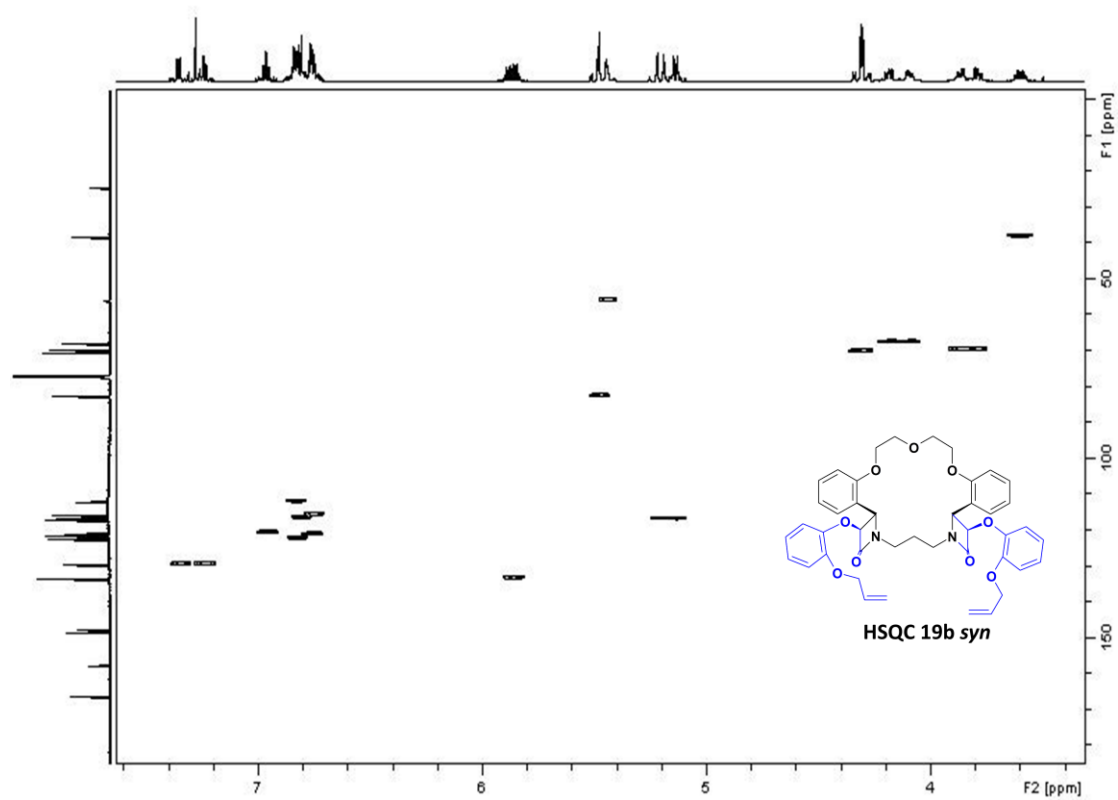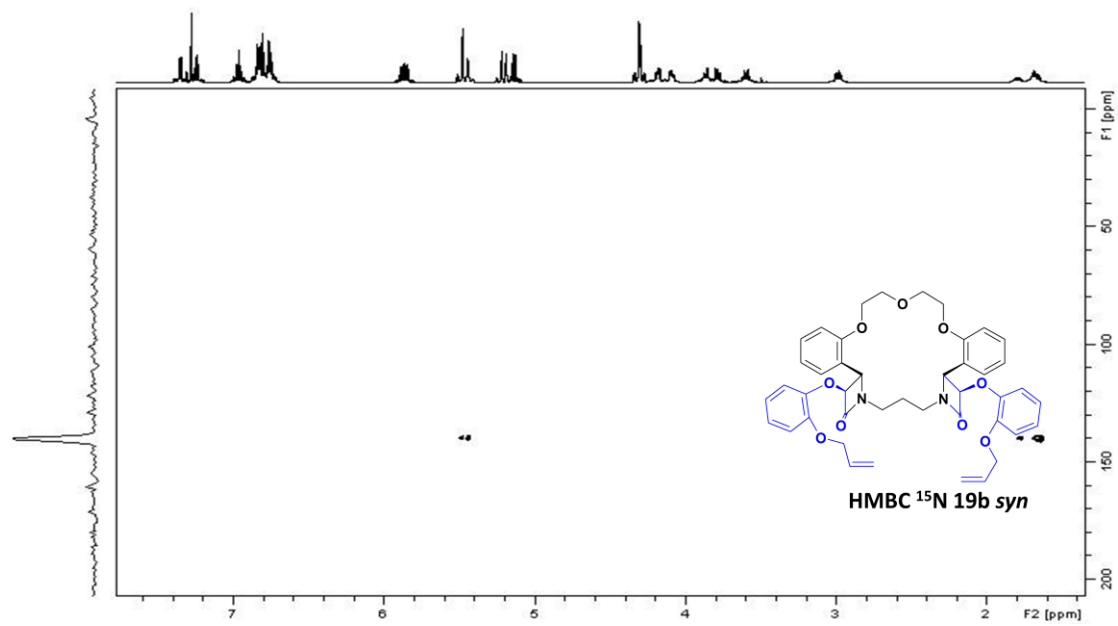

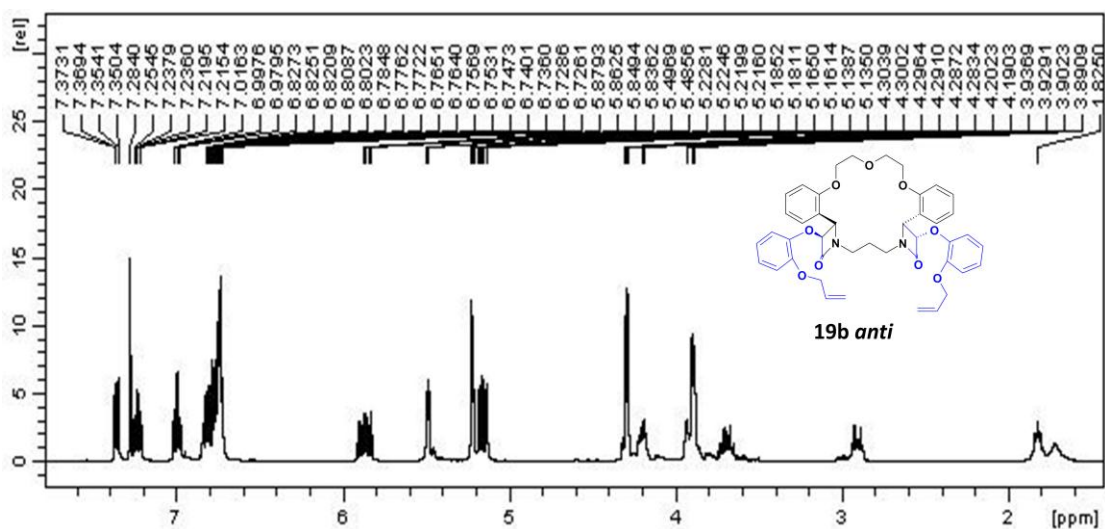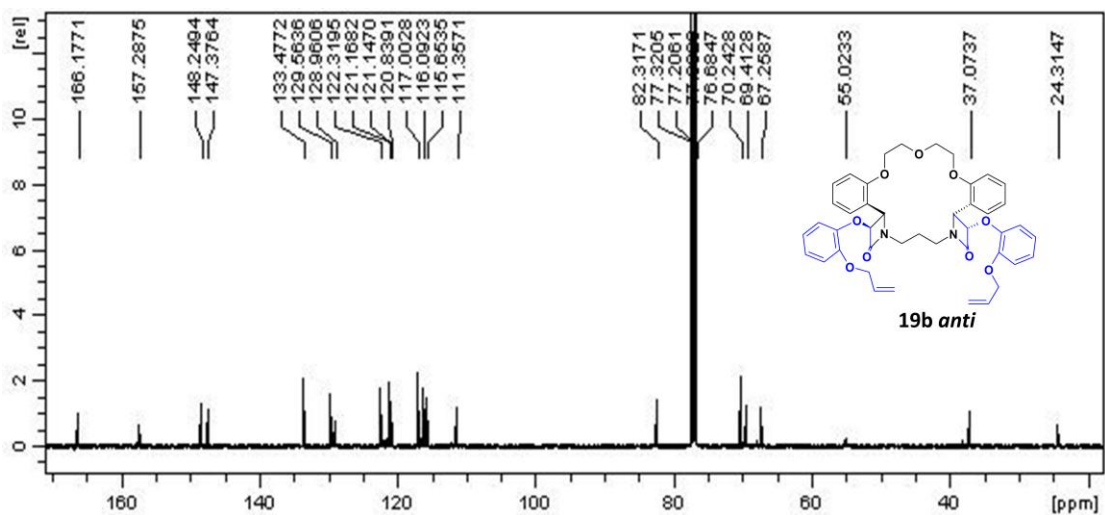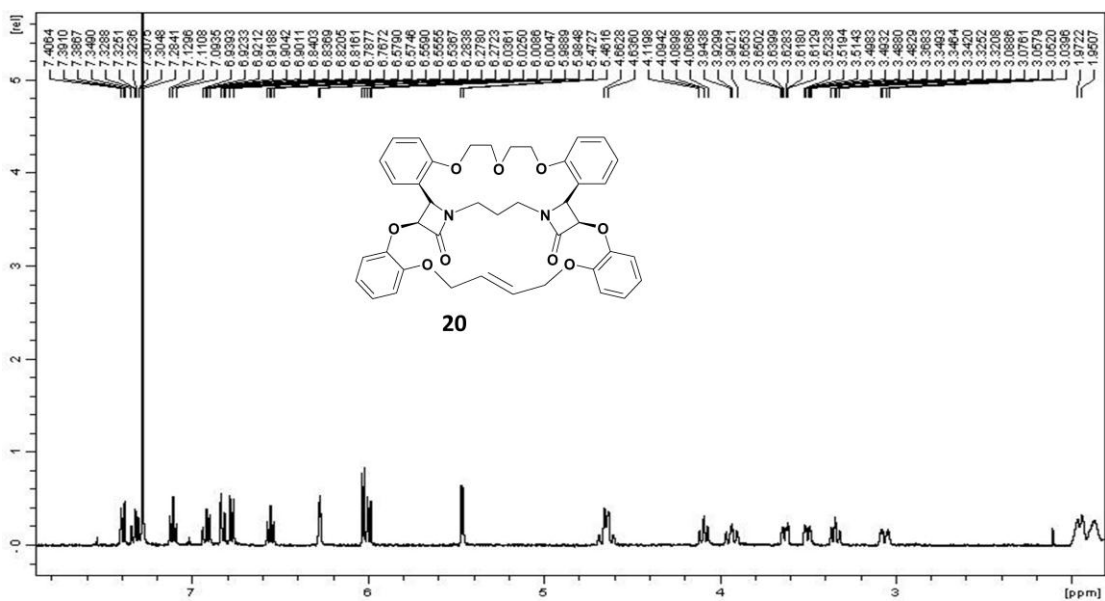

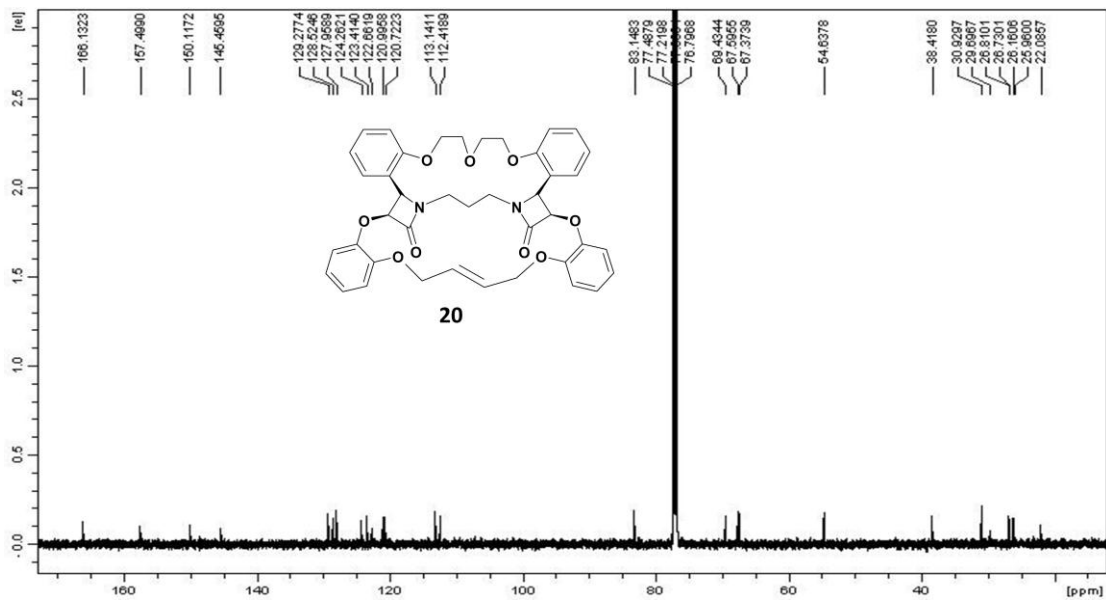

Supplement: c3ra40649k.pdf [file c3ra40649k.pdf]
